# Supplementary material for: Impact of non-pharmaceutical interventions against COVID-19 in Europe in 2020: a quasi-experimental non-equivalent group and time series design study
Source: PubMed Central journal article supplement (PMC8284045; doi:10.2807/1560-7917.es.2021.26.28.2001401), 2021-07-15

## Impact of non-pharmaceutical interventions against COVID-19

This supplementary material is hosted by *Eurosurveillance* as supporting information alongside the article “Impact of non-pharmaceutical interventions against COVID-19 in Europe: a quasi-experimental non-equivalent group and time-series design study”, on behalf of the authors, who remain responsible for the accuracy and appropriateness of the content. The same standards for ethics, copyright, attributions and permissions as for the article apply. Supplements are not edited by *Eurosurveillance* and the journal is not responsible for the maintenance of any links or email addresses provided therein.

### SUPPLEMENTARY MATERIAL part 1. Dates that restrictions were imposed in states/regions of Italy, Spain, and Germany

Dates in March when restrictions were imposed: eg., 15 = 15 March,

| Spain       | massgath | initbuscl | educcl | nonessent | SAHO |
|-------------|----------|-----------|--------|-----------|------|
| Andalucia   | 15       | 15        | 14     | 15        | 15   |
| Aragon      | 15       | 15        | 14     | 15        | 15   |
| Asturias    | 15       | 15        | 14     | 15        | 15   |
| Islas B     | 15       | 15        | 14     | 15        | 15   |
| Basque C    | 15       | 15        | 14     | 15        | 15   |
| Canaries    | 15       | 15        | 14     | 15        | 15   |
| Cantabria   | 15       | 15        | 14     | 15        | 15   |
| C&Leon      | 15       | 15        | 14     | 15        | 15   |
| C-LaM       | 15       | 15        | 14     | 15        | 15   |
| Catalonia   | 11       | 12        | 14     | 15        | 15   |
| Ceuta       | 15       | 15        | 14     | 15        | 15   |
| C Madrid    | 15       | 13        | 11     | 13        | 15   |
| Extremadura | 15       | 15        | 14     | 15        | 15   |
| Galicia     | 15       | 15        | 14     | 15        | 15   |
| La Rioja    | 15       | 15        | 14     | 15        | 15   |
| Melilla     | 15       | 15        | 14     | 15        | 15   |
| Murcia      | 15       | 15        | 14     | 15        | 15   |
| Navarre     | 15       | 15        | 14     | 15        | 15   |
| C Valencian | 15       | 15        | 14     | 15        | 15   |
| medians     | 15       | 15        | 14     | 15        | 15   |

## Impact of non-pharmaceutical interventions against COVID-19

### SUPPLEMENTARY MATERIAL part 1. Dates that restrictions were imposed in states/regions of Italy, Spain, and Germany (continued)

Dates in March when restrictions were imposed: eg., 11 = 11 March, -7 = 7 days before 1 March, or 23 Feb.

| Italy      | massgath | initbuscl | educlosed | nonessent | SAHO |
|------------|----------|-----------|-----------|-----------|------|
| Abruzzo    | 11       | 11        | 5         | 11        | 11   |
| Basilicata | 11       | 11        | 5         | 11        | 11   |
| Calabria   | 11       | 11        | 5         | 11        | 11   |
| Campania   | 11       | 11        | 5         | 11        | 11   |
| Emilia-R   | 7        | 7         | 1         | 11        | 11   |
| F-V Giulia | 11       | 11        | 5         | 11        | 11   |
| Lazio      | 11       | 11        | 5         | 11        | 11   |
| Liguria    | 11       | 11        | 5         | 11        | 11   |
| Lombardia  | -7       | -7        | 1         | 8         | 8    |
| Marche     | 7        | 7         | 5         | 11        | 11   |
| Molise     | 11       | 11        | 5         | 11        | 11   |
| Piemonte   | 7        | 7         | 5         | 11        | 11   |
| di Bolzano | 11       | 11        | 5         | 11        | 11   |
| di Trento  | 11       | 11        | 5         | 11        | 11   |
| Puglia     | 11       | 11        | 5         | 11        | 11   |
| Sardegna   | 11       | 11        | 5         | 11        | 11   |
| Sicilia    | 11       | 11        | 5         | 11        | 11   |
| Toscana    | 11       | 11        | 5         | 11        | 11   |
| Umbria     | 11       | 11        | 5         | 11        | 11   |
| V d'Aosta  | 11       | 11        | 5         | 11        | 11   |
| Veneto     | -7       | -7        | 1         | 11        | 11   |
| medians    | 11       | 11        | 5         | 11        | 11   |

## Impact of non-pharmaceutical interventions against COVID-19

### SUPPLEMENTARY MATERIAL part 1. Dates that restrictions were imposed in states/regions of Italy, Spain, and Germany (continued)

**Dates in March when restrictions were imposed: eg., 22 = 22 March, -3 = 3 days before 1 March, or 27 Feb.**

|         | massgath | initbuscl | educclosed | nonessent | SAHO |
|---------|----------|-----------|------------|-----------|------|
| Germany | 21       | 21        | 17         | 21        | 21   |
|         | 21       | 17        | 16         | 21        | 21   |
|         | 23       | 14        | 23         | 23        | 23   |
|         | 23       | 17        | 18         | 17        | 17   |
|         | 17       | 20        | 16         | 20        | 22   |
|         | 22       | 15        | 16         |           | 22   |
|         | 22       | 15        | 16         |           | 22   |
|         | 23       | 27        | 16         | 27        | 23   |
|         | 23       | 18        | 16         | 18        | 23   |
|         | 23       | -3        | 16         | 23        | 23   |
|         | 22       | 23        | 16         | 23        | 22   |
|         | 21       | 15        | 16         |           | 21   |
|         | 22       | 24        | 16         | 24        | 22   |
|         | 23       | 23        | 23         | 23        | 23   |
|         | 24       | 14        | 16         | 24        | 24   |
|         | 22       | 15        | 17         |           | 22   |
| medians | 22       | 17        | 16         | 23        | 22   |

# Impact of non-pharmaceutical interventions against COVID-19

## **SUPPLEMENTARY MATERIAL part 2: Orders or recommendations to wear facemasks or face coverings, by sovereign territory in Europe**

### **Austria 6 April 2020 (compulsory)**

Compulsory in shops and most commercial premises from 6 April 2020, soon widened to public transport and shops that were due to re-open on 14 April.

<https://uk.reuters.com/article/us-health-coronavirus-austria/austria-to-make-basic-face-masks-compulsory-in-supermarkets-idUKKBN21H16A>

<https://uk.reuters.com/article/uk-health-coronavirus-austria-masks/austrian-supermarkets-hand-out-face-masks-before-they-become-compulsory-idUKKBN21J5XP>

=====

### **Bulgaria 30 March 2020 (mix recommended/compulsory)**

Strong recommendation from 30 March; made compulsory in all public places from 12 April; extended to 13 May.

<https://sofiaglobe.com/2020/03/30/covid-19-bulgaria-makes-wearing-a-protective-mask-in-public-places-compulsory/>

<https://www.bnr.bg/en/post/101257255/bulgaria-introduces-mandatory-wearing-of-masks-in-public-from-april-12-until-april-26-inclusive>

<https://www.novinite.com/articles/204264/The+Mandatory+Wearing+of+Protective+Masks+is+Extended+until+May+13>

=====

### **Czechia 18 March 2020 (compulsory)**

Mandatory in all public spaces and many work places. Order extended until end of June 2020.

<https://www.praguemorning.cz/face-masks-now-mandatory-in-all-prague-shops-and-offices/>

<https://news.expats.cz/weekly-czech-news/prymula-face-masks-to-remain-mandatory-in-czech-republic-until-end-of-june/>

=====

### **Estonia 5 April 2020 (highly recommended) statement by PM**

<https://news.err.ee/1073236/prime-minister-we-are-unfortunately-still-in-coronavirus-deepening-phase>

=====

### **France 5 April (encouraged not required)**

<https://www.thelocal.fr/20200406/mask-or-no-mask-what-is-the-official-coronavirus-advice-in-france>

## Impact of non-pharmaceutical interventions against COVID-19

<https://www.france24.com/en/20200405-coronavirus-abrupt-reversal-on-mask-policy-in-france-and-the-us-raises-new-questions>

=====

### **Germany 1 April 2020 (recommendation that became compulsory)**

Variable rules for when must be worn vary by state and sometimes by city, introduced dates also variable. Nationally mandated from 27 April on public transport & also in most shops before then. RKI formally endorsed mask-wearing on 1 April.

<https://www.thelocal.de/20200402/latest-face-masks-in-public-could-help-to-reduce-spread-of-coronavirus-says-germanys-robert-koch-institute>

<https://muscateer.com/en/news/europe-updategermany-new-face-mask-rules-in-idZ2trbg==>

=====

**Italy 6 April mandatory in some regions**, some settings by 6 April, endorsed by national govt previously but uneven uptake.

Lombardy, Tuscany 6 April mandatory anywhere outdoors

[https://www.ansa.it/english/news/2020/04/06/coronavirus-lombardy-makes-face-masks-compulsory\\_a852ffdb-a0dd-4c55-a725-e852c5a2fc43.html](https://www.ansa.it/english/news/2020/04/06/coronavirus-lombardy-makes-face-masks-compulsory_a852ffdb-a0dd-4c55-a725-e852c5a2fc43.html)

<https://uk.reuters.com/article/us-health-coronavirus-italy-masks/scramble-for-masks-as-italian-region-orders-coronavirus-cover-up-idUKKBN21O1Y0>

<https://www.thelocal.it/20200406/coronavirus-where-should-you-wear-a-face-mask-in-italy>

=====

### **Lithuania 1 April (recommendation)**

<https://www.ecdc.europa.eu/sites/default/files/documents/COVID-19-use-face-masks-community.pdf>

=====

### **Luxembourg 20 April 2020 (compulsory in some situations , where can't keep 2m apart)**

<https://uk.reuters.com/article/us-health-coronavirus-luxembourg/luxembourg-enforces-use-of-masks-as-lockdown-eases-idUKKBN2221W3>

=====

### **Norway 5 April (encouraged)**

<https://www.newsinenglish.no/2020/04/05/officials-change-their-minds-about-masks/>

<https://www.fhi.no/en/op/novel-coronavirus-facts-advice/facts-and-general-advice/hand-hygiene-cough-etiquette-face-masks-cleaning-and-laundry/>

=====

### **Poland 16 April (mandatory, most public places)**

<https://www.aljazeera.com/news/2020/04/countries-wearing-face-masks-compulsory-200423094510867.html>

## Impact of non-pharmaceutical interventions against COVID-19

=====

### **Slovakia 14 March (recommendation, followed by requirement from about 1 April)**

<https://balkaninsight.com/2020/04/09/slovak-news-crews-hailed-for-covid-19-coverage/>

<https://www.npr.org/sections/coronavirus-live-updates/2020/04/01/825180019/in-big-adjustment-some-european-countries-push-for-residents-to-wear-masks>

<https://balkaninsight.com/2020/04/09/slovak-news-crews-hailed-for-covid-19-coverage/>

<https://www.ecdc.europa.eu/sites/default/files/documents/COVID-19-use-face-masks-community.pdf>

=====

### **Slovenia 29 March (mandatory in many places)**

<https://english.sta.si/2746850/slovenia-sticking-to-use-of-masks-in-indoor-public-places>

=====

### **Spain 13 April (recommended and sometimes freely given out, ie train stations, but not compulsory)**

<https://www.rtve.es/noticias/20200413/como-colocar-retirar-desechar-mascarillas-higienicas-para-evitar-contagio-coronavirus/2011879.shtml>

<https://www.thelocal.es/20200424/what-are-the-rules-for-wearing-a-protective-mask-in-spain>

=====

### **Countries with no predominant government recommendation or compulsion in place (as of noon 29.4)**

Belgium, Croatia, Republic of Cyprus (south), Denmark, Finland, Greece, Hungary, Ireland, Latvia, Malta, Netherlands, Portugal (likely soon), Romania, Sweden, Switzerland, UK

### **Netherlands** Masks are not a substitute for 1.5 m

<https://www.dutchnews.nl/news/2020/04/dutch-stay-firm-on-face-masks-but-they-may-have-an-exit-strategy-role/>

### **Hungary 27 April** mandatory, commuters & shoppers but in Budapest only

<https://www.themayor.eu/en/budapest-makes-masks-mandatory-for-shoppers-and-commuters>

### **UK**

Scotland's first minister recommended (did not mandate) that face coverings (not surgical grade masks) should be worn in all enclosed public spaces, from 28 April 2020. Because Scotland comprises 5.5 million (just 8.2% of the total UK population of approximately 67.9 million) we still (as of 29.4.20) treated the entirety of the UK as a country without an official endorsement of face coverings in our modelling.

<https://www.gov.scot/publications/coronavirus-covid-19-public-use-of-face-coverings/>

# Impact of non-pharmaceutical interventions against COVID-19

## SUPPLEMENTARY MATERIAL part 3: Variance Inflation Factors (VIF) for Analysis 1, run as linear models

Variance inflation factors

mass\_gathering\_restrictions 4.915550  
initial\_business\_closure **10.011556**  
education\_facilities 9.490315  
non\_essential\_services 6.253501  
stay\_home 3.514925  
masks 1.432351  
tests per million population as of 16 April 2020 1.295814

## SUPPLEMENTARY MATERIAL part 4: Collinearity Diagnostics

### Variance inflation factors for Analysis 2 model fit as linear regression

| Variable                                   | VIF   | 1/VIF    |
|--------------------------------------------|-------|----------|
| Initial business closures                  | 10.44 | 0.095815 |
| Education closures                         | 9.87  | 0.101302 |
| Mass gatherings banned                     | 6.52  | 0.153397 |
| Non essential business closures            | 6.27  | 0.159552 |
| Days elapsed into main epidemic            | 6.15  | 0.162476 |
| Stay at home order                         | 3.52  | 0.284366 |
| Mask advisory/mandate imposed              | 1.47  | 0.680742 |
| Tests per 1 million/population by 16 April | 1.31  | 0.764803 |
| Mean VIF                                   | 5.69  |          |

## Impact of non-pharmaceutical interventions against COVID-19

### SUPPLEMENTARY MATERIAL part 4: Collinearity Diagnostics (continued)

Analysis 2 Model when fit as linear regression, yielded condition indices and variance-decomposition proportions

| Dimension -<br>>                      | 1                           | 2           | 3           | 4           | 5           | 6           | 7            | 8            | 9           |
|---------------------------------------|-----------------------------|-------------|-------------|-------------|-------------|-------------|--------------|--------------|-------------|
| Condition indices ->                  | <b>1</b>                    | <b>2.61</b> | <b>3.56</b> | <b>5.08</b> | <b>6.04</b> | <b>9.37</b> | <b>11.44</b> | <b>14.71</b> | <b>15.9</b> |
| Model Parameter                       | <b>Variance proportions</b> |             |             |             |             |             |              |              |             |
| Constant                              | 0                           | 0.03        | 0.01        | 0.01        | 0.31        | 0.21        | 0.14         | 0.26         | 0.03        |
| Mass gathering restriction            | 0                           | 0           | 0           | 0.06        | 0           | 0.02        | 0.49         | 0.13         | 0.3         |
| Initial business closure              | 0                           | 0           | 0           | 0           | 0.03        | 0.01        | 0.27         | 0.04         | <b>0.65</b> |
| Education facilities closed           | 0                           | 0           | 0           | 0.01        | 0.02        | 0.04        | 0.1          | 0.33         | 0.5         |
| Non essential services closed         | 0                           | 0           | 0           | 0.05        | 0.02        | 0.61        | 0.15         | 0.01         | <b>0.15</b> |
| Stay at home order                    | 0                           | 0.02        | 0.04        | 0.2         | 0.23        | 0.48        | 0            | 0.01         | 0.03        |
| Masks advisory or mandated            | 0                           | 0.17        | 0.72        | 0.01        | 0.02        | 0.04        | 0            | 0.02         | 0.01        |
| Days elapsed from start main epidemic | 0                           | 0           | 0           | 0.01        | 0           | 0           | 0            | 0.78         | 0.2         |
| Tests/1 mln population to 16 April    | 0                           | 0.09        | 0.07        | 0.2         | 0.15        | 0.26        | 0.19         | 0            | 0.03        |



# Impact of non-pharmaceutical interventions against COVID-19

## SUPPLEMENTARY MATERIAL part 4: Collinearity Diagnostics (continued)

### Principal components/correlation

Number of observations = 1588

| Component | Eigenvalue | Difference | Proportion | Cumulative |
|-----------|------------|------------|------------|------------|
| Comp1     | 5.2667     | 4.21318    | 0.6583     | 0.6583     |
| Comp2     | 1.05353    | 0.302265   | 0.1317     | 0.79       |
| Comp3     | 0.751261   | 0.26581    | 0.0939     | 0.8839     |
| Comp4     | 0.485451   | 0.3267     | 0.0607     | 0.9446     |
| Comp5     | 0.158751   | 0.041833   | 0.0198     | 0.9645     |
| Comp6     | 0.116918   | 0.008604   | 0.0146     | 0.9791     |
| Comp7     | 0.108315   | 0.049241   | 0.0135     | 0.9926     |
| Comp8     | 0.059073   | .          | 0.0074     | 1          |

**SUPPLEMENTARY MATERIAL part 5:** Please see separate document for full regression model specifications and outputs. **Alternative results using different time step units for epidemic response, Analysis 2.** Tested variations are 4 days, 7 days, 10 days or 14 day units. The main manuscript describes the results when using 7 day time response periods, as there was little difference in the overall trends of a decline in risk ratios with time since interventions were imposed. Please see Supplementary Material 6 (below) for further detail showing between model comparisons.

# Impact of non-pharmaceutical interventions against COVID-19

**SUPPLEMENTARY MATERIAL part 6: Alternative results using different time step units for epidemic response, Analysis 2:** Comparisons of Incident Risk Ratios (IRRs) when models were generated using different time step response units: 4, 7, 10 or 14 days.

## 6A: IRRs for CASES

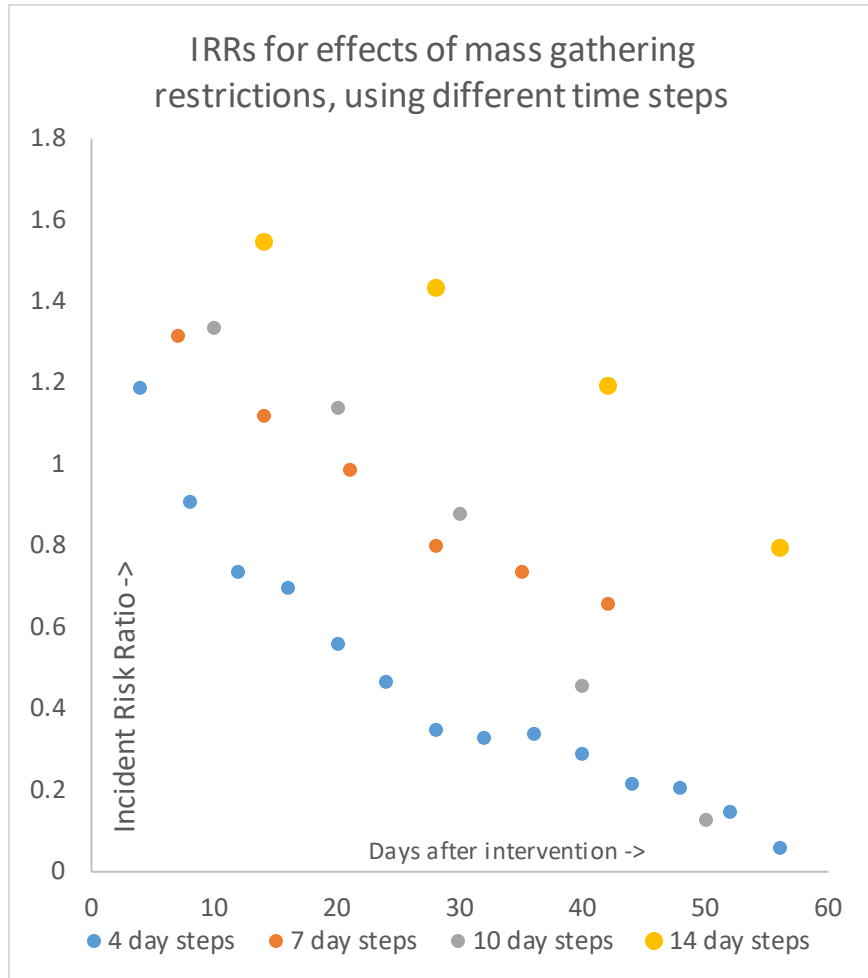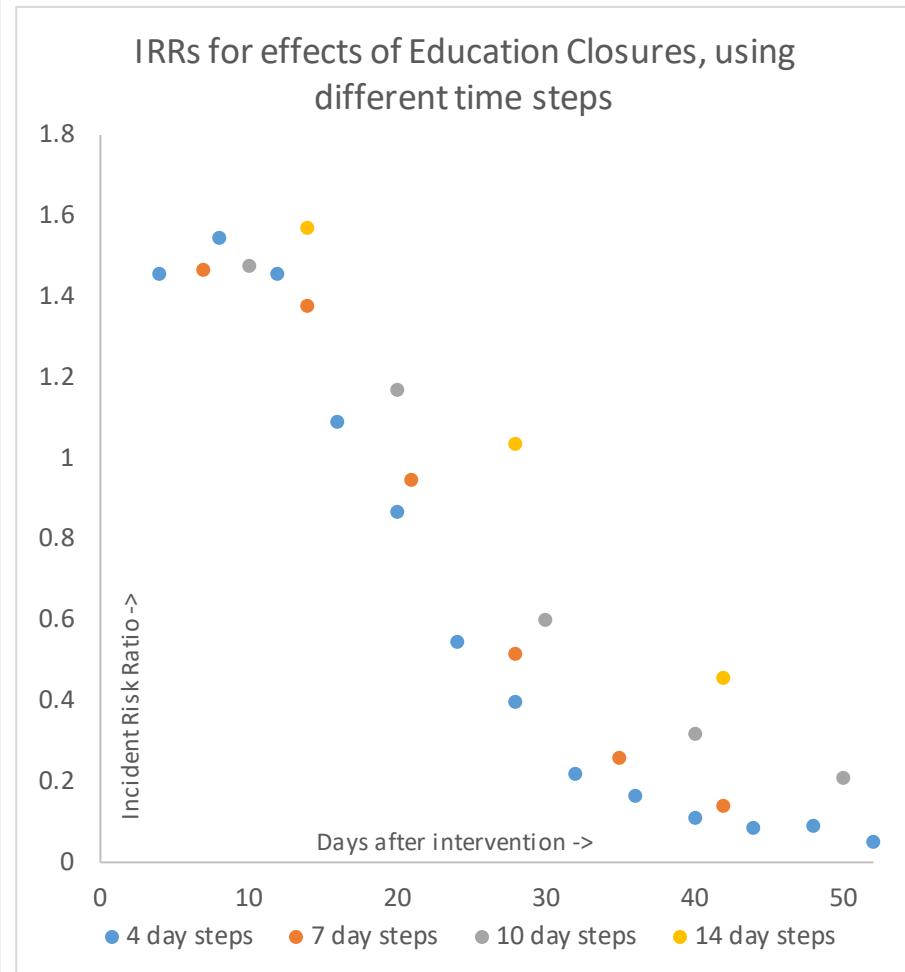

# Impact of non-pharmaceutical interventions against COVID-19

## 6A: IRRS for CASES (continued)

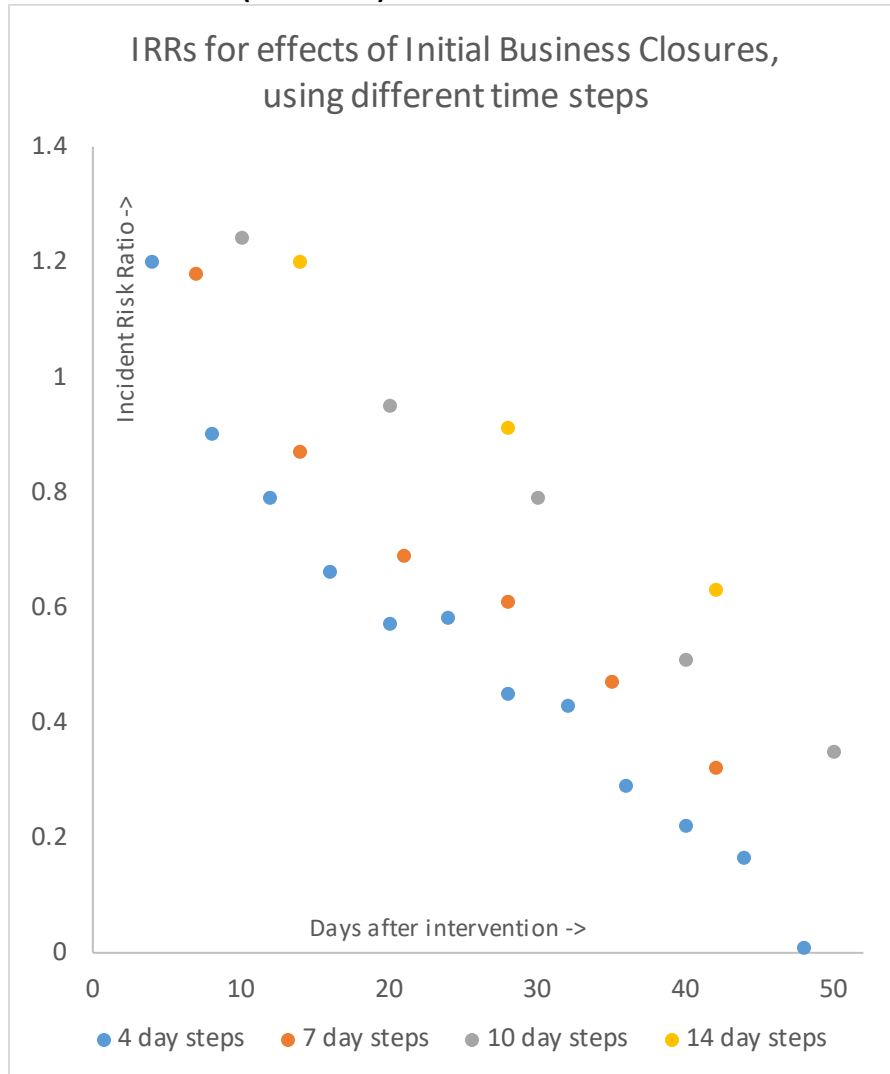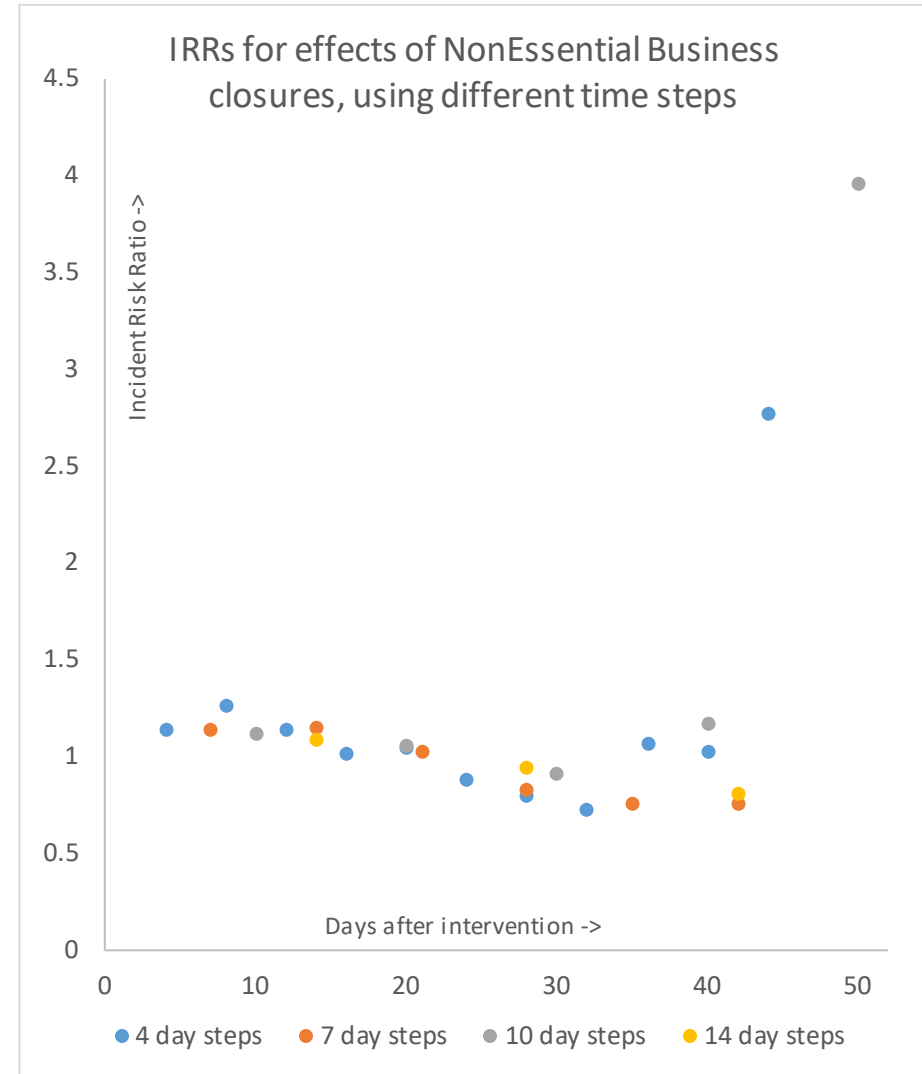

# Impact of non-pharmaceutical interventions against COVID-19

## 6A: IRRs for CASES (continued)

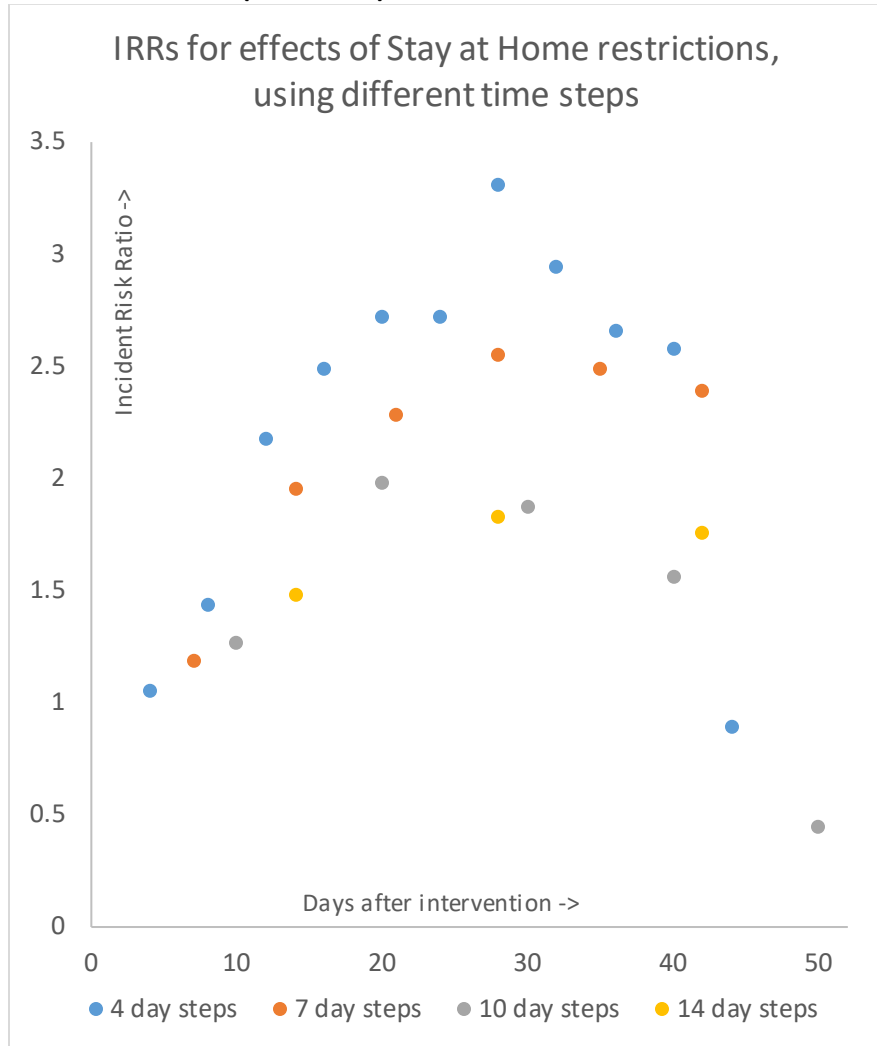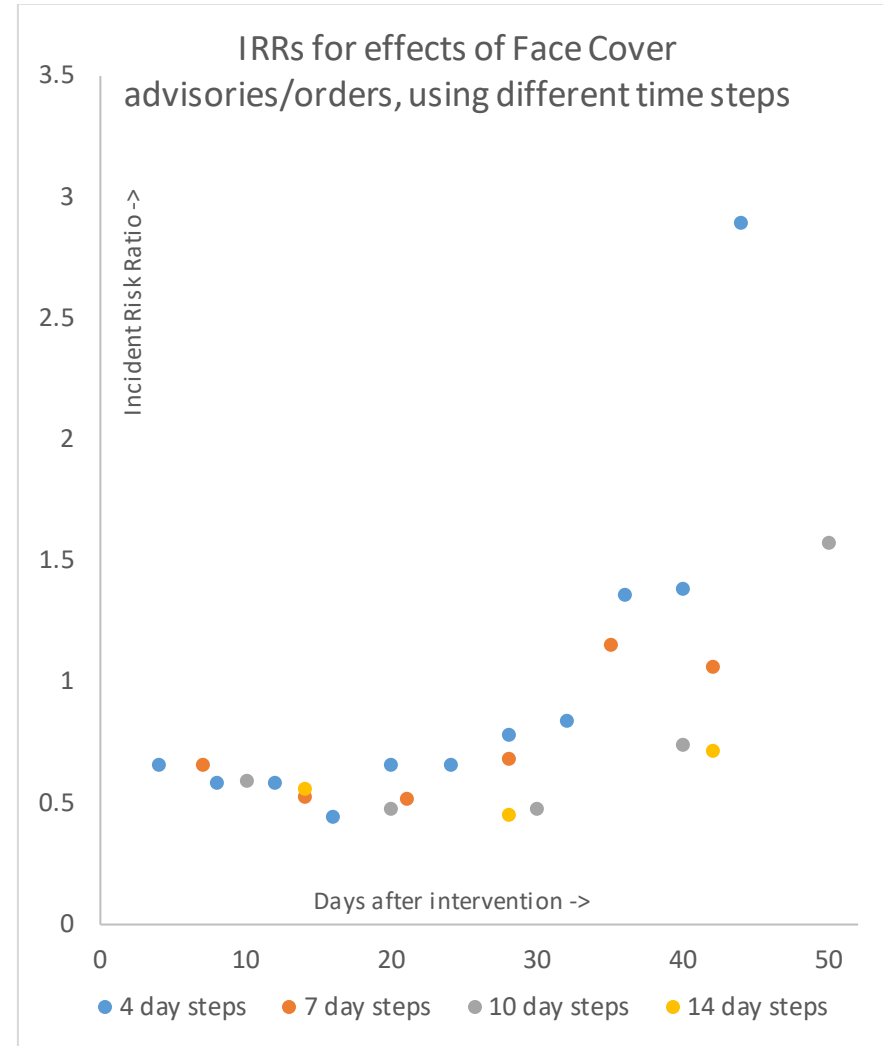

# Impact of non-pharmaceutical interventions against COVID-19

## 6B: IRRS for DEATHS

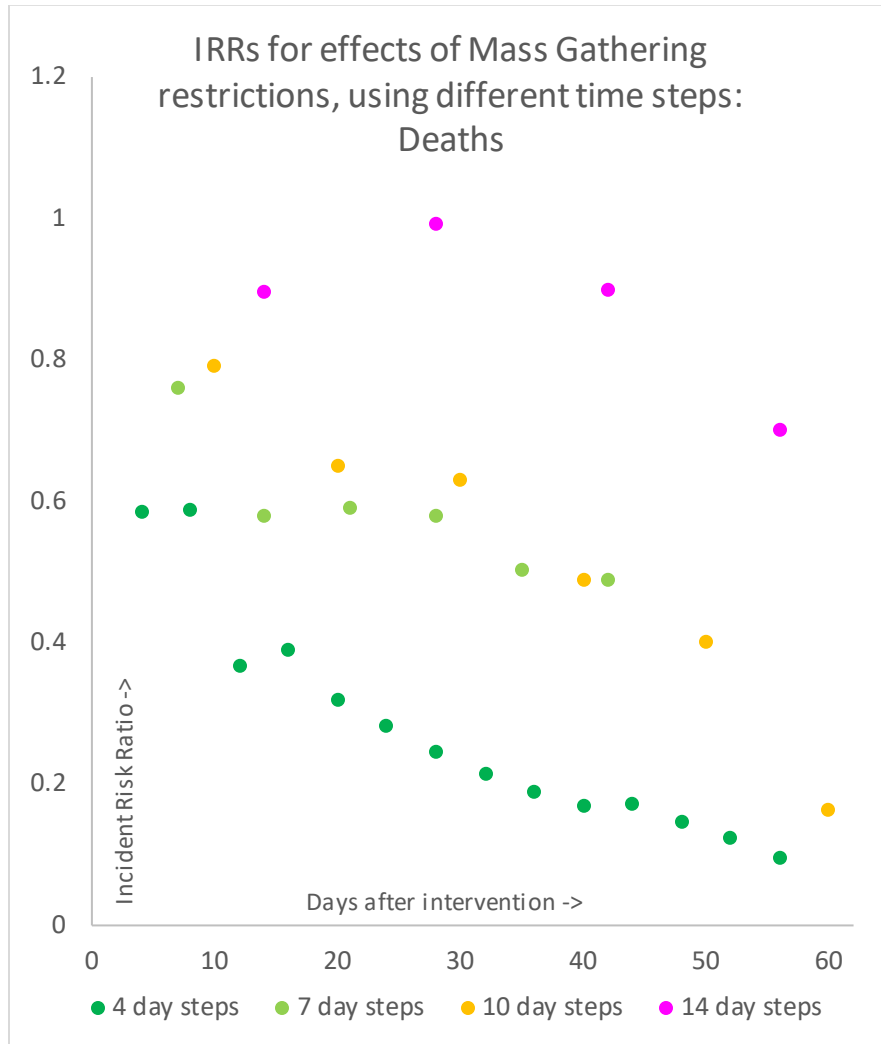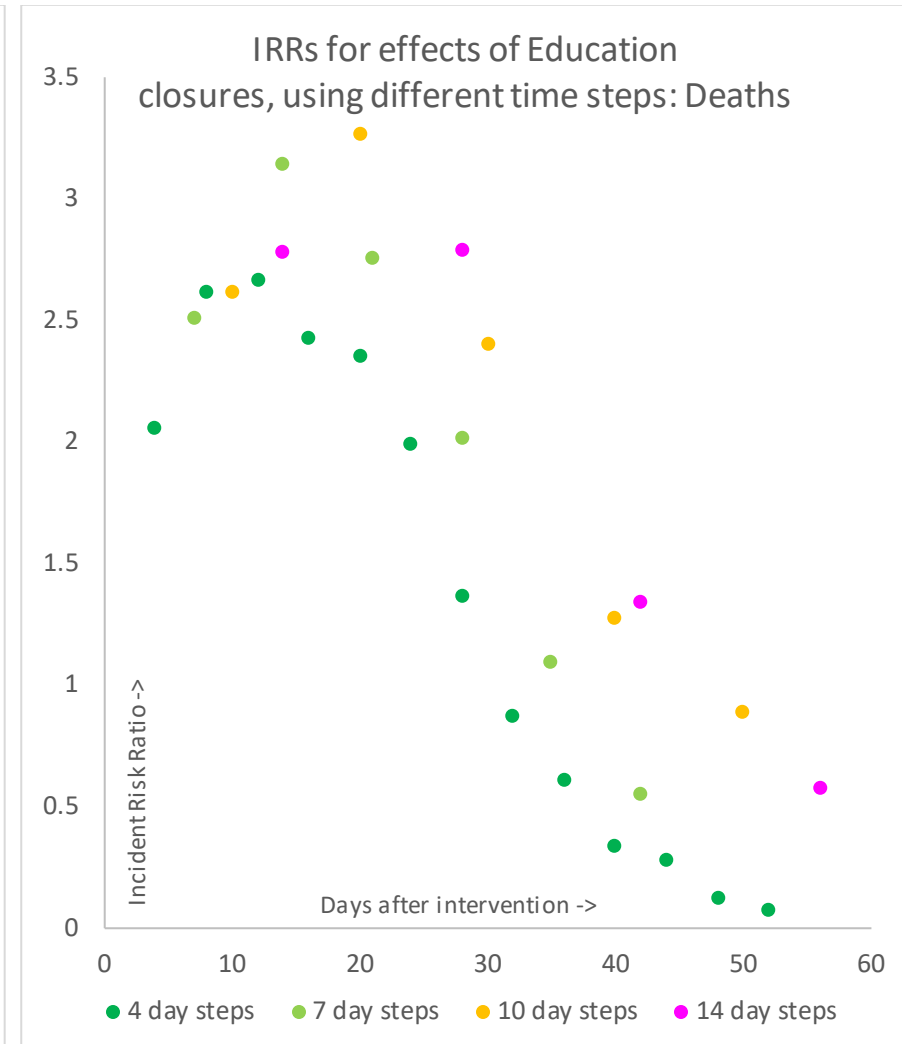

# Impact of non-pharmaceutical interventions against COVID-19

## 6B: IRRS for DEATHS (continued)

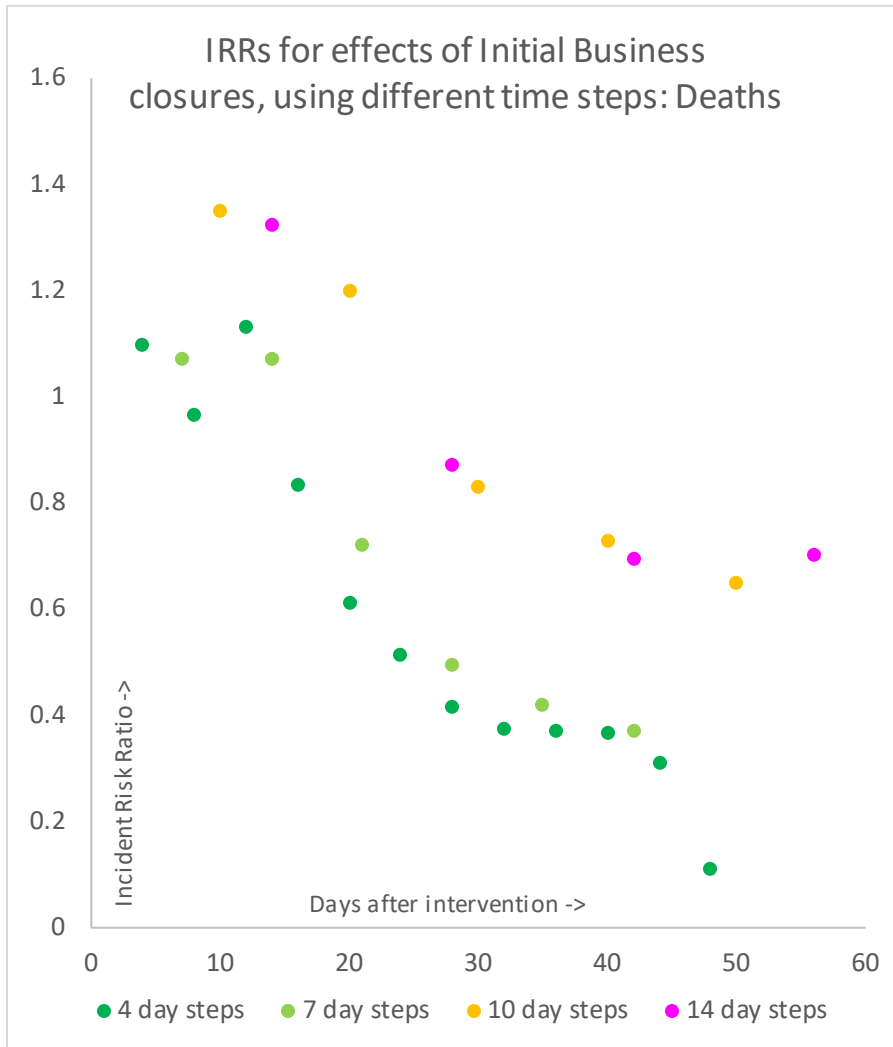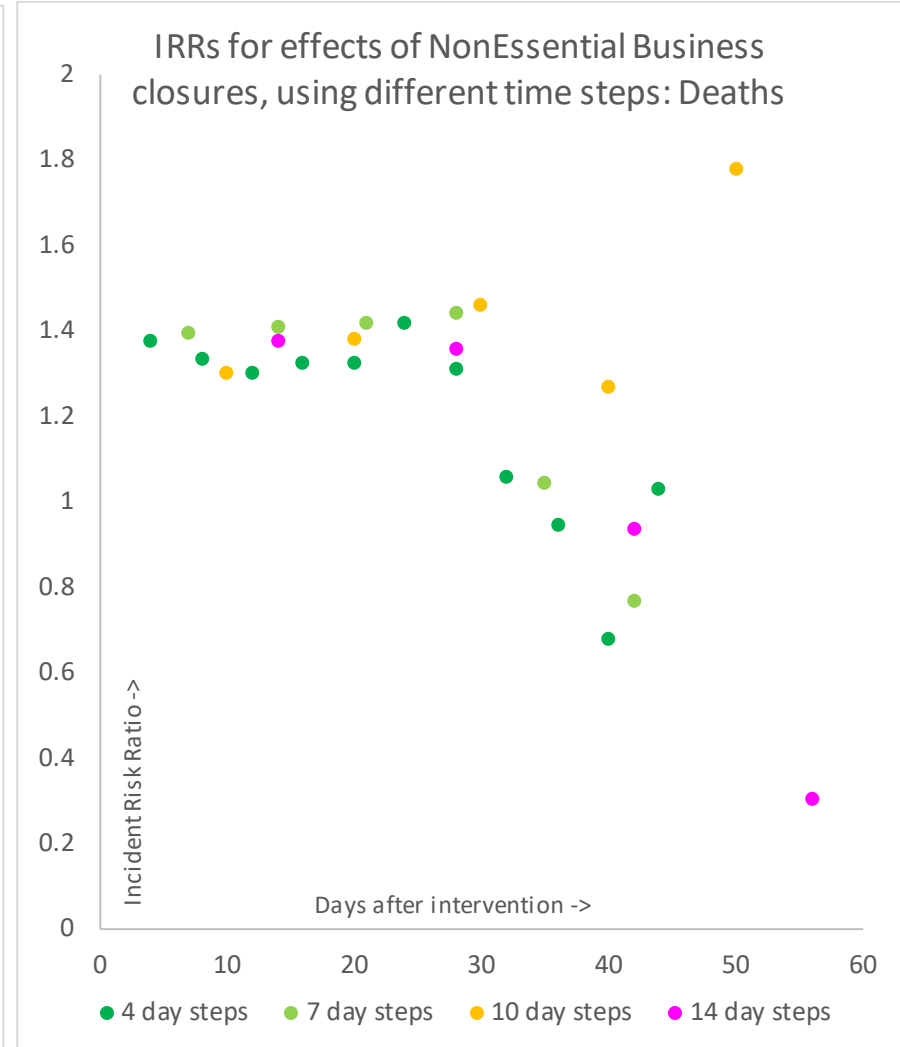

# Impact of non-pharmaceutical interventions against COVID-19

## 6B: IRRS for DEATHS (continued)

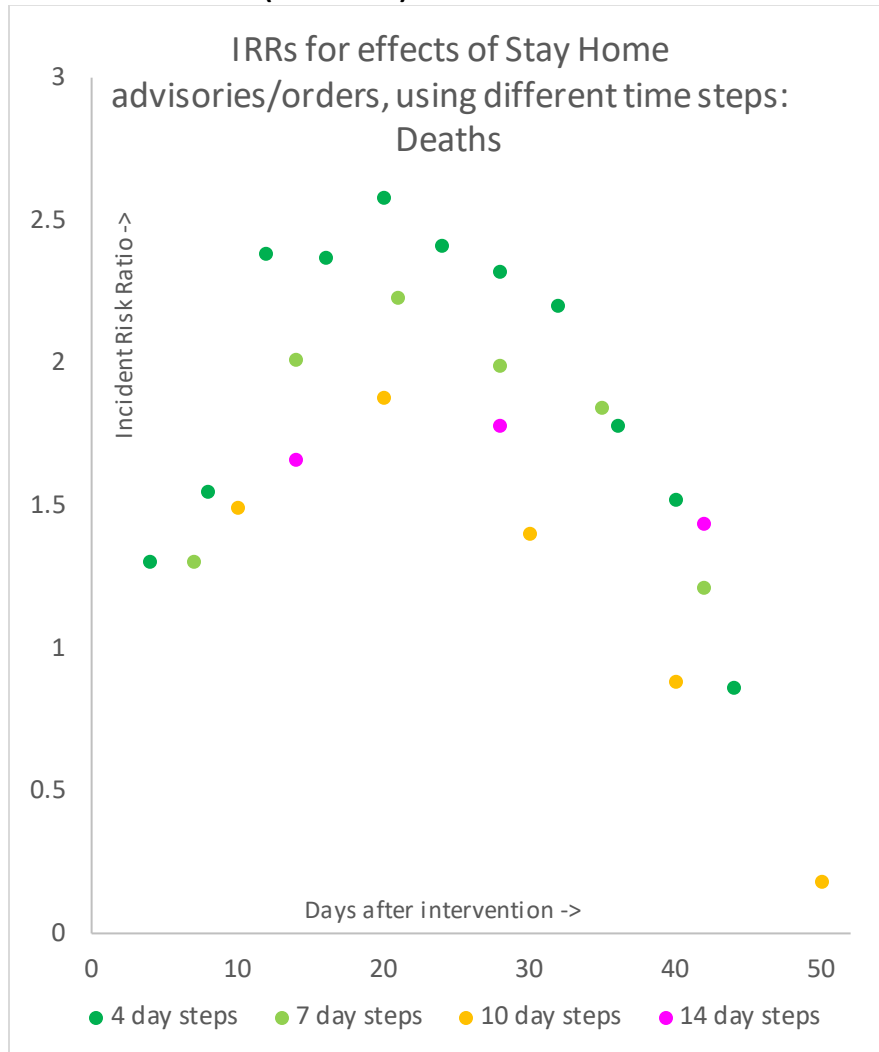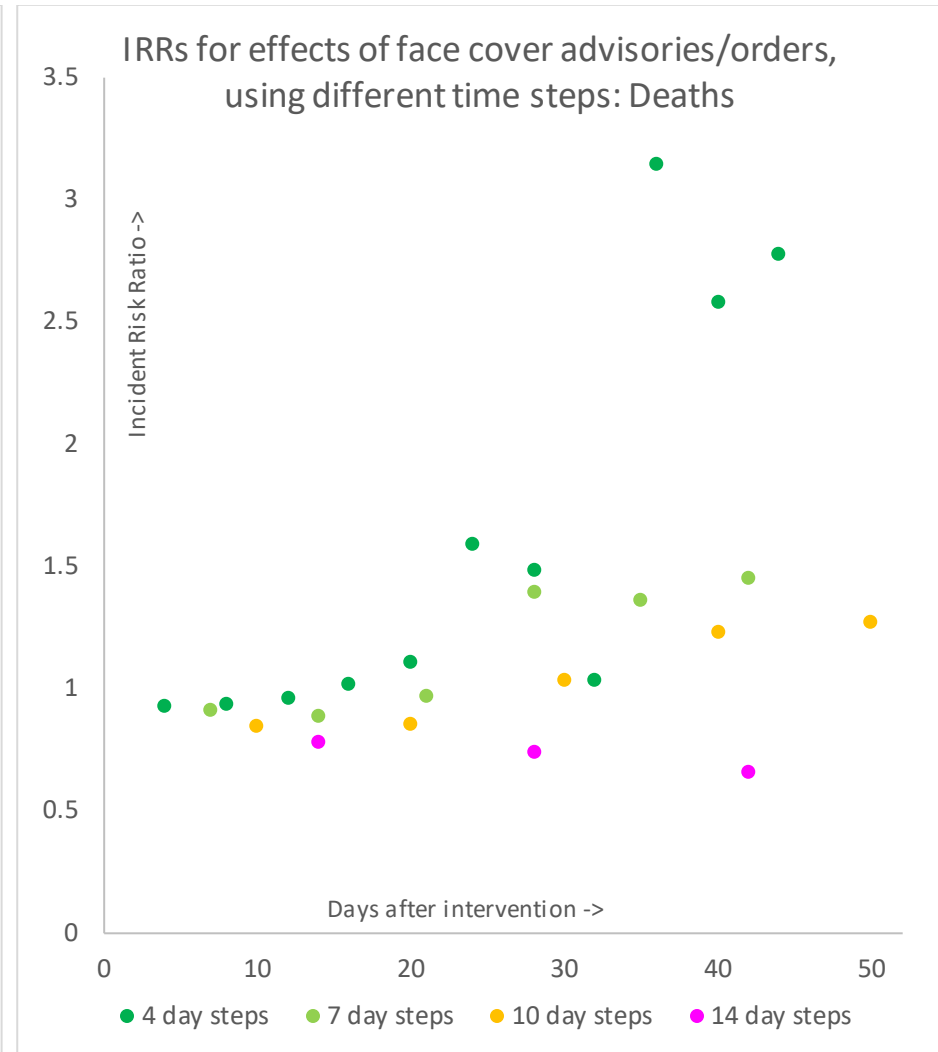

Supplement: 20-01401_BRAINARD_Supplement1.pdf [file 20-01401_BRAINARD_Supplement1.pdf]
