# Supplementary material for: Impact of non-pharmaceutical interventions against COVID-19 in Europe in 2020: a quasi-experimental non-equivalent group and time series design study
Source: PubMed Central journal article supplement (PMC8284045; doi:10.2807/1560-7917.es.2021.26.28.2001401), 2021-07-15
Supplement: 20-01401_BRAINARD_Supplement2.pdf [file 20-01401_BRAINARD_Supplement2.pdf]

## Impact of non-pharmaceutical interventions against COVID-19

This supplementary material is hosted by *Eurosurveillance* as supporting information alongside the article “Impact of non-pharmaceutical interventions against COVID-19 in Europe: a quasi-experimental non-equivalent group and time-series design study “, on behalf of the authors, who remain responsible for the accuracy and appropriateness of the content. The same standards for ethics, copyright, attributions and permissions as for the article apply. Supplements are not edited by *Eurosurveillance* and the journal is not responsible for the maintenance of any links or email addresses provided therein.

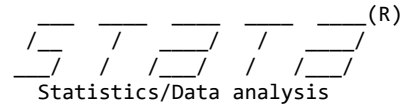

Iteration 7: log likelihood = **-9080.8363**  
 name: <unnamed>  
 log: C:\Users\PaulH\Dropbox\001Covid19 files\Sensitivity analyses with varying time gaps.smcl  
 log type: smcl  
 opened on: 28 Feb 2021, 18:00:34

1 . menbreg cases ib0.mass ib0.business ib0.education ib0.non\_essential ib0.home ib0.masks dayfromfirst tests1mpop16ap

Fitting fixed-effects model:

Iteration 0: log likelihood = **-9994.792** (not concave)  
 Iteration 1: log likelihood = **-9728.5026**  
 Iteration 2: log likelihood = **-9423.4215**  
 Iteration 3: log likelihood = **-9289.1035**  
 Iteration 4: log likelihood = **-9287.8567**  
 Iteration 5: log likelihood = **-9287.854**  
 Iteration 6: log likelihood = **-9287.854**

Refining starting values:

Grid node 0: log likelihood = **-9150.7276**

Fitting full model:

Iteration 0: log likelihood = **-9150.7276** (not concave)  
 Iteration 1: log likelihood = **-9144.1122** (not concave)  
 Iteration 2: log likelihood = **-9137.8038**  
 Iteration 3: log likelihood = **-9107.7886**  
 Iteration 4: log likelihood = **-9081.8283**  
 Iteration 5: log likelihood = **-9080.841**  
 Iteration 6: log likelihood = **-9080.8363**  
 Iteration 7: log likelihood = **-9080.8363**

Mixed-effects nbinomial regression  
 Overdispersion: mean  
 Group variable: country\_code  
 Number of obs = 1,588  
 Number of groups = 30  
 Obs per group:  
 min = 42  
 avg = 52.9  
 max = 63

Integration method: mvaghermite  
 Integration pts. = 7

Log likelihood = **-9080.8363**  
 Wald chi2(38) = 3579.53  
 Prob > chi2 = 0.0000

| cases            | IRR      | Std. Err. | z     | P> z  | [95% Conf. Interval] |
|------------------|----------|-----------|-------|-------|----------------------|
| <b>mass</b>      |          |           |       |       |                      |
| 1                | 1.317029 | .1196723  | 3.03  | 0.002 | 1.102175 1.573765    |
| 2                | 1.125023 | .1379665  | 0.96  | 0.337 | .8846566 1.430698    |
| 3                | .9909768 | .1532647  | -0.06 | 0.953 | .7318406 1.34187     |
| 4                | .7990745 | .1476335  | -1.21 | 0.225 | .5563179 1.147761    |
| 5                | .7410227 | .1605023  | -1.38 | 0.166 | .484691 1.132917     |
| 6                | .6604644 | .1673839  | -1.64 | 0.102 | .4019077 1.085357    |
| <b>business</b>  |          |           |       |       |                      |
| 1                | 1.183943 | .1265193  | 1.58  | 0.114 | .9602165 1.459797    |
| 2                | .8705053 | .1228561  | -0.98 | 0.326 | .6601456 1.147898    |
| 3                | .689605  | .1169872  | -2.19 | 0.028 | .4945376 .9616155    |
| 4                | .6074017 | .1245851  | -2.43 | 0.015 | .4063355 .907961     |
| 5                | .4714363 | .1140889  | -3.11 | 0.002 | .2933795 .7575586    |
| 6                | .3212351 | .0919537  | -3.97 | 0.000 | .1833016 .562963     |
| <b>education</b> |          |           |       |       |                      |
| 1                | 1.47373  | .1447278  | 3.95  | 0.000 | 1.215698 1.786529    |
| 2                | 1.376326 | .1895708  | 2.32  | 0.020 | 1.050702 1.802865    |
| 3                | .9470467 | .1642194  | -0.31 | 0.754 | .6741735 1.330366    |
| 4                | .5207754 | .1083542  | -3.14 | 0.002 | .3463752 .7829864    |
| 5                | .2582716 | .062911   | -5.56 | 0.000 | .1602275 .4163096    |
| 6                | .1433753 | .0402787  | -6.91 | 0.000 | .0826694 .2486591    |

|              |           |              |        |       |           |          |
|--------------|-----------|--------------|--------|-------|-----------|----------|
| non_essent~1 |           |              |        |       |           |          |
| 1            | 1.142639  | .1234961     | 1.23   | 0.217 | .9245092  | 1.412234 |
| 2            | 1.146635  | .1439661     | 1.09   | 0.276 | .8965042  | 1.466554 |
| 3            | 1.018911  | .1389382     | 0.14   | 0.891 | .7799502  | 1.331085 |
| 4            | .8253778  | .1312559     | -1.21  | 0.228 | .6043524  | 1.127237 |
| 5            | .759917   | .1443942     | -1.44  | 0.148 | .5236327  | 1.102822 |
| 6            | .7628685  | .1966775     | -1.05  | 0.294 | .4602552  | 1.264447 |
| home         |           |              |        |       |           |          |
| 1            | 1.194981  | .1243872     | 1.71   | 0.087 | .9744476  | 1.465426 |
| 2            | 1.951905  | .224044      | 5.83   | 0.000 | 1.558676  | 2.444339 |
| 3            | 2.275837  | .2798113     | 6.69   | 0.000 | 1.788492  | 2.895979 |
| 4            | 2.550771  | .3529303     | 6.77   | 0.000 | 1.944901  | 3.345381 |
| 5            | 2.489913  | .4261743     | 5.33   | 0.000 | 1.780296  | 3.48238  |
| 6            | 2.393275  | .5782635     | 3.61   | 0.000 | 1.490476  | 3.842908 |
| masks        |           |              |        |       |           |          |
| 1            | .6583008  | .0615543     | -4.47  | 0.000 | .5480662  | .7907074 |
| 2            | .528956   | .0566382     | -5.95  | 0.000 | .4288218  | .6524726 |
| 3            | .5206164  | .0675501     | -5.03  | 0.000 | .4037144  | .6713693 |
| 4            | .6819353  | .1249588     | -2.09  | 0.037 | .4761763  | .976604  |
| 5            | 1.146066  | .2871408     | 0.54   | 0.586 | .7013678  | 1.872724 |
| 6            | 1.059821  | .3458243     | 0.18   | 0.859 | .5590897  | 2.009016 |
| dayfromfirst | 1.138656  | .0074957     | 19.72  | 0.000 | 1.124059  | 1.153442 |
| tests1mpop~r | 1.000055  | 8.54e-06     | 6.46   | 0.000 | 1.000038  | 1.000072 |
| _cons        | 2.93e-07  | 5.09e-08     | -86.48 | 0.000 | 2.08e-07  | 4.12e-07 |
| ln(pop~2018) |           | 1 (exposure) |        |       |           |          |
| /lnalpha     | -.7180626 | .0377877     |        |       | -.7921251 | -.644    |
| country_code |           |              |        |       |           |          |
| var(_cons)   | .2640212  | .0740418     |        |       | .1523803  | .4574554 |

Note: Estimates are transformed only in the first equation.

Note: \_cons estimates baseline incidence rate (conditional on zero random effects).

LR test vs. nbinomial model:  $\chi^2(01) = 414.04$  Prob >=  $\chi^2 = 0.0000$

2 . menbreg cases ib0.mass4 ib0.business4 ib0.education4 ib0.non\_essential4 ib0.home4 ib0.masks4 dayfromfirst tests1mpop~r

Fitting fixed-effects model:

Iteration 0: log likelihood = -9986.8369 (not concave)  
 Iteration 1: log likelihood = -9718.087  
 Iteration 2: log likelihood = -9455.4816  
 Iteration 3: log likelihood = -9260.6121  
 Iteration 4: log likelihood = -9258.192  
 Iteration 5: log likelihood = -9258.184  
 Iteration 6: log likelihood = -9258.184

Refining starting values:

Grid node 0: log likelihood = -9117.515

Fitting full model:

Iteration 0: log likelihood = -9117.515 (not concave)  
 Iteration 1: log likelihood = -9110.9696 (not concave)  
 Iteration 2: log likelihood = -9104.6382  
 Iteration 3: log likelihood = -9059.2946  
 Iteration 4: log likelihood = -9020.1352  
 Iteration 5: log likelihood = -9015.6862  
 Iteration 6: log likelihood = -9014.9553  
 Iteration 7: log likelihood = -9014.9141  
 Iteration 8: log likelihood = -9014.914

Mixed-effects nbinomial regression Number of obs = 1,588

Overdispersion: mean

Group variable: country\_code Number of groups = 30

Obs per group:  
 min = 42  
 avg = 52.9  
 max = 63

Integration method: mvaghermite Integration pts. = 7

Log likelihood = -9014.914 Wald chi2(74) = 4123.30  
 Prob > chi2 = 0.0000

| cases          | IRR      | Std. Err. | z     | P> z  | [95% Conf. Interval] |
|----------------|----------|-----------|-------|-------|----------------------|
| mass4          |          |           |       |       |                      |
| 1              | 1.185258 | .1176035  | 1.71  | 0.087 | .9757871 1.439696    |
| 2              | .9096095 | .1069167  | -0.81 | 0.420 | .7224431 1.145266    |
| 3              | .7401525 | .1030979  | -2.16 | 0.031 | .5633198 .9724951    |
| 4              | .6979264 | .112031   | -2.24 | 0.025 | .5095362 .9559701    |
| 5              | .5606689 | .1017057  | -3.19 | 0.001 | .3929144 .8000461    |
| 6              | .4650396 | .0938509  | -3.79 | 0.000 | .313117 .6906741     |
| 7              | .3496517 | .0782323  | -4.70 | 0.000 | .2255198 .542109     |
| 8              | .3327507 | .0814023  | -4.50 | 0.000 | .2060088 .5374675    |
| 9              | .3380323 | .0910834  | -4.03 | 0.000 | .1993428 .5732128    |
| 10             | .2857476 | .0835348  | -4.28 | 0.000 | .1611181 .5067817    |
| 11             | .2210622 | .0707774  | -4.71 | 0.000 | .1180282 .414041     |
| 12             | .210928  | .0782178  | -4.20 | 0.000 | .1019732 .4362974    |
| 13             | .1535516 | .0684175  | -4.21 | 0.000 | .0641191 .3677234    |
| 14             | .0618684 | .0348283  | -4.94 | 0.000 | .0205255 .1864855    |
| business4      |          |           |       |       |                      |
| 1              | 1.196626 | .1353321  | 1.59  | 0.112 | .9587203 1.493567    |
| 2              | .9023284 | .126786   | -0.73 | 0.465 | .6851133 1.188411    |
| 3              | .789744  | .1262493  | -1.48 | 0.140 | .5773143 1.08034     |
| 4              | .6610521 | .1180563  | -2.32 | 0.020 | .465823 .9381029     |
| 5              | .5675012 | .1113741  | -2.89 | 0.004 | .3862918 .833716     |
| 6              | .583267  | .1282284  | -2.45 | 0.014 | .3790835 .8974285    |
| 7              | .4548825 | .1127513  | -3.18 | 0.001 | .279842 .7394106     |
| 8              | .4323347 | .1172199  | -3.09 | 0.002 | .2541159 .7355433    |
| 9              | .2882276 | .0863427  | -4.15 | 0.000 | .1602308 .5184719    |
| 10             | .2190637 | .073024   | -4.56 | 0.000 | .1139792 .4210319    |
| 11             | .1651703 | .0647106  | -4.60 | 0.000 | .0766385 .3559727    |
| 12             | .0091631 | .0104551  | -4.11 | 0.000 | .0009791 .0857558    |
| education4     |          |           |       |       |                      |
| 1              | 1.456755 | .1490419  | 3.68  | 0.000 | 1.192064 1.780221    |
| 2              | 1.54878  | .2073416  | 3.27  | 0.001 | 1.19134 2.013462     |
| 3              | 1.457869 | .2329389  | 2.36  | 0.018 | 1.065892 1.993994    |
| 4              | 1.092813 | .2020773  | 0.48  | 0.631 | .7605824 1.570167    |
| 5              | .8684146 | .1800988  | -0.68 | 0.496 | .5783598 1.303936    |
| 6              | .5471565 | .1261643  | -2.62 | 0.009 | .348209 .8597716     |
| 7              | .3983053 | .1022937  | -3.58 | 0.000 | .2407734 .6589064    |
| 8              | .2216427 | .0626413  | -5.33 | 0.000 | .1273751 .385676     |
| 9              | .1645677 | .0512526  | -5.79 | 0.000 | .0893816 .3029988    |
| 10             | .1116608 | .0379659  | -6.45 | 0.000 | .0573433 .2174296    |
| 11             | .0856576 | .0331237  | -6.35 | 0.000 | .0401427 .1827785    |
| 12             | .0908273 | .0582404  | -3.74 | 0.000 | .0258469 .3191722    |
| 13             | .0548464 | .0509094  | -3.13 | 0.002 | .008893 .338258      |
| non_essential4 |          |           |       |       |                      |
| 1              | 1.139119 | .1308484  | 1.13  | 0.257 | .9094802 1.42674     |
| 2              | 1.258193 | .1638699  | 1.76  | 0.078 | .9747309 1.624088    |
| 3              | 1.144833 | .1587013  | 0.98  | 0.329 | .8724596 1.502239    |
| 4              | 1.017415 | .1440874  | 0.12  | 0.903 | .7708147 1.342908    |
| 5              | 1.047637 | .1545559  | 0.32  | 0.752 | .7845749 1.398901    |
| 6              | .8795601 | .1447269  | -0.78 | 0.435 | .637096 1.2143       |
| 7              | .8038324 | .1438234  | -1.22 | 0.222 | .5660656 1.141469    |
| 8              | .7328725 | .1437931  | -1.58 | 0.113 | .4989059 1.07656     |
| 9              | 1.067588 | .2528525  | 0.28  | 0.782 | .6711214 1.698268    |
| 10             | 1.020293 | .3168747  | 0.06  | 0.948 | .5550926 1.875359    |
| 11             | 2.773997 | 1.677676  | 1.69  | 0.092 | .8478341 9.07614     |
| home4          |          |           |       |       |                      |
| 1              | 1.050294 | .1224825  | 0.42  | 0.674 | .8356919 1.320006    |

|                 |          |            |        |       |           |           |
|-----------------|----------|------------|--------|-------|-----------|-----------|
| 2               | 1.442408 | .1781364   | 2.97   | 0.003 | 1.13231   | 1.837431  |
| 3               | 2.18335  | .2813717   | 6.06   | 0.000 | 1.696007  | 2.810729  |
| 4               | 2.491129 | .3259727   | 6.98   | 0.000 | 1.927585  | 3.219428  |
| 5               | 2.716038 | .3724418   | 7.29   | 0.000 | 2.075932  | 3.553517  |
| 6               | 2.71914  | .4031361   | 6.75   | 0.000 | 2.03345   | 3.636048  |
| 7               | 3.307177 | .5339675   | 7.41   | 0.000 | 2.410043  | 4.538267  |
| 8               | 2.940677 | .5413366   | 5.86   | 0.000 | 2.049997  | 4.218338  |
| 9               | 2.660378 | .6168096   | 4.22   | 0.000 | 1.688853  | 4.190779  |
| 10              | 2.581587 | .8114433   | 3.02   | 0.003 | 1.39424   | 4.78009   |
| 11              | .8914859 | .7986507   | -0.13  | 0.898 | .1540115  | 5.16031   |
| masks4          |          |            |        |       |           |           |
| 1               | .655428  | .0705672   | -3.92  | 0.000 | .5307375  | .8094132  |
| 2               | .5767203 | .0670066   | -4.74  | 0.000 | .4592697  | .7242068  |
| 3               | .5849548 | .0734933   | -4.27  | 0.000 | .4572755  | .7482843  |
| 4               | .4436336 | .0613972   | -5.87  | 0.000 | .3382371  | .581872   |
| 5               | .6561941 | .1000257   | -2.76  | 0.006 | .4867221  | .8846746  |
| 6               | .6569734 | .1262464   | -2.19  | 0.029 | .4507937  | .9574536  |
| 7               | .7840156 | .2008676   | -0.95  | 0.342 | .4745083  | 1.295405  |
| 8               | .8409724 | .2470652   | -0.59  | 0.556 | .472837   | 1.495726  |
| 9               | 1.362676 | .4150369   | 1.02   | 0.310 | .7501322  | 2.47541   |
| 10              | 1.381992 | .6027965   | 0.74   | 0.458 | .5877992  | 3.249243  |
| 11              | 2.888456 | 2.179965   | 1.41   | 0.160 | .6580364  | 12.6789   |
| dayfromfirst    | 1.172339 | .0085949   | 21.69  | 0.000 | 1.155614  | 1.189306  |
| tests1mpop16apr | 1.000052 | .0000104   | 5.06   | 0.000 | 1.000032  | 1.000073  |
| _cons           | 2.54e-07 | 5.24e-08   | -73.46 | 0.000 | 1.69e-07  | 3.80e-07  |
| ln(popdata2018) | 1        | (exposure) |        |       |           |           |
| /lnalpha        | -.816131 | .0384955   |        |       | -.8915807 | -.7406813 |
| country_code    |          |            |        |       |           |           |
| var(_cons)      | .3986612 | .1128118   |        |       | .2289464  | .6941832  |

Note: Estimates are transformed only in the first equation.

Note: \_cons estimates baseline incidence rate (conditional on zero random effects).

LR test vs. nbinomial model: chibar2(01) = 486.54 Prob >= chibar2 = **0.0000**

3 . menbreg cases ib0.mass10 ib0.business10 ib0.education10 ib0.non\_essential10 ib0.home10 ib0.masks10 dayfromfirst te

Fitting fixed-effects model:

Iteration 0: log likelihood = -9994.7123 (not concave)  
 Iteration 1: log likelihood = -9729.7216  
 Iteration 2: log likelihood = -9400.1142  
 Iteration 3: log likelihood = -9314.0225  
 Iteration 4: log likelihood = -9310.3497  
 Iteration 5: log likelihood = -9310.341  
 Iteration 6: log likelihood = -9310.341

Refining starting values:

Grid node 0: log likelihood = -9172.6869

Fitting full model:

Iteration 0: log likelihood = -9172.6869 (not concave)  
 Iteration 1: log likelihood = -9166.0565 (not concave)  
 Iteration 2: log likelihood = -9159.8536  
 Iteration 3: log likelihood = -9116.4445  
 Iteration 4: log likelihood = -9108.8947  
 Iteration 5: log likelihood = -9108.8151  
 Iteration 6: log likelihood = -9108.8147

Mixed-effects nbinomial regression  
 Overdispersion: mean  
 Group variable: country\_code  
 Number of obs = 1,588  
 Number of groups = 30

Obs per group:  
 min = 42  
 avg = 52.9  
 max = 63

Integration method: mvaghermite

Integration pts. = 7

Log likelihood = -9108.8147

Wald chi2(33) = 3378.08  
 Prob > chi2 = 0.0000

| cases           | IRR       | Std. Err.  | z      | P> z  | [95% Conf. Interval] |           |
|-----------------|-----------|------------|--------|-------|----------------------|-----------|
| mass10          |           |            |        |       |                      |           |
| 1               | 1.344834  | .1218836   | 3.27   | 0.001 | 1.125962             | 1.606253  |
| 2               | 1.142497  | .1495364   | 1.02   | 0.309 | .8839848             | 1.476607  |
| 3               | .8847125  | .1507808   | -0.72  | 0.472 | .6334797             | 1.235582  |
| 4               | .6812934  | .1465837   | -1.78  | 0.074 | .4468831             | 1.038662  |
| 5               | .4624673  | .1235176   | -2.89  | 0.004 | .2739926             | .7805906  |
| 6               | .1330454  | .0568681   | -4.72  | 0.000 | .0575662             | .307491   |
| business10      |           |            |        |       |                      |           |
| 1               | 1.242759  | .1301701   | 2.07   | 0.038 | 1.012115             | 1.525964  |
| 2               | .9461983  | .1383282   | -0.38  | 0.705 | .7104637             | 1.26015   |
| 3               | .788907   | .148699    | -1.26  | 0.208 | .5452367             | 1.141475  |
| 4               | .5075358  | .1206429   | -2.85  | 0.004 | .3185174             | .8087236  |
| 5               | .3524099  | .1169214   | -3.14  | 0.002 | .1839244             | .675238   |
| education10     |           |            |        |       |                      |           |
| 1               | 1.480886  | .1430543   | 4.06   | 0.000 | 1.225448             | 1.789567  |
| 2               | 1.165597  | .1648493   | 1.08   | 0.279 | .8834126             | 1.537917  |
| 3               | .5976606  | .1088434   | -2.83  | 0.005 | .4182514             | .8540274  |
| 4               | .3167193  | .0719422   | -5.06  | 0.000 | .2029204             | .4943373  |
| 5               | .211947   | .0606602   | -5.42  | 0.000 | .120951              | .3714027  |
| non_essential10 |           |            |        |       |                      |           |
| 1               | 1.121458  | .1166766   | 1.10   | 0.271 | .9145844             | 1.375124  |
| 2               | 1.05786   | .1320182   | 0.45   | 0.652 | .8283241             | 1.351001  |
| 3               | .9092745  | .1379363   | -0.63  | 0.531 | .6754113             | 1.224113  |
| 4               | 1.167886  | .2336179   | 0.78   | 0.438 | .7890969             | 1.728504  |
| 5               | 3.964275  | 1.980284   | 2.76   | 0.006 | 1.489227             | 10.55277  |
| home10          |           |            |        |       |                      |           |
| 1               | 1.273257  | .1249543   | 2.46   | 0.014 | 1.050464             | 1.543302  |
| 2               | 1.982338  | .2200223   | 6.17   | 0.000 | 1.594783             | 2.464073  |
| 3               | 1.872801  | .2487633   | 4.72   | 0.000 | 1.443534             | 2.429721  |
| 4               | 1.56168   | .285629    | 2.44   | 0.015 | 1.09121              | 2.23499   |
| 5               | .4451837  | .2615056   | -1.38  | 0.168 | .1407779             | 1.40781   |
| masks10         |           |            |        |       |                      |           |
| 1               | .5949662  | .0519296   | -5.95  | 0.000 | .5014158             | .7059705  |
| 2               | .4794569  | .052917    | -6.66  | 0.000 | .3861924             | .5952446  |
| 3               | .4821065  | .0823776   | -4.27  | 0.000 | .3449039             | .6738882  |
| 4               | .7418492  | .1820478   | -1.22  | 0.224 | .458599              | 1.200047  |
| 5               | 1.567337  | 1.186874   | 0.59   | 0.553 | .3552924             | 6.914153  |
| dayfromfirst    | 1.123644  | .0068083   | 19.24  | 0.000 | 1.110379             | 1.137067  |
| tests1mpop16apr | 1.000054  | 8.33e-06   | 6.43   | 0.000 | 1.000037             | 1.00007   |
| _cons           | 3.34e-07  | 5.66e-08   | -87.86 | 0.000 | 2.39e-07             | 4.65e-07  |
| ln(popdata2018) | 1         | (exposure) |        |       |                      |           |
| /lnalpha        | -.6825385 | .0376508   |        |       | -.7563328            | -.6087442 |
| country_code    |           |            |        |       |                      |           |
| var(_cons)      | .2505226  | .0693896   |        |       | .1455732             | .4311339  |

Note: Estimates are transformed only in the first equation.  
 Note: \_cons estimates baseline incidence rate (conditional on zero random effects).  
 LR test vs. nbinomial model: chibar2(01) = 403.05 Prob >= chibar2 = 0.0000

4 . testparm ib0.mass10

```
( 1) [cases]1.mass10 = 0
( 2) [cases]2.mass10 = 0
( 3) [cases]3.mass10 = 0
( 4) [cases]4.mass10 = 0
( 5) [cases]5.mass10 = 0
( 6) [cases]6.mass10 = 0

      chi2( 6) =    64.89
      Prob > chi2 =    0.0000
```

5 . menbreg cases ib0.mass14 ib0.business14 ib0.education14 ib0.non\_essential14 ib0.home14 ib0.masks14 dayfromfirst to  
note: 4.home14 omitted because of collinearity

Fitting fixed-effects model:

```
Iteration 0: log likelihood = -10004.262 (not concave)
Iteration 1: log likelihood = -9743.3976
Iteration 2: log likelihood = -9461.711
Iteration 3: log likelihood = -9345.9307
Iteration 4: log likelihood = -9345.2049
Iteration 5: log likelihood = -9345.2044
```

Refining starting values:

Grid node 0: log likelihood = -9214.5766

Fitting full model:

```
Iteration 0: log likelihood = -9214.5766 (not concave)
Iteration 1: log likelihood = -9207.8849 (not concave)
Iteration 2: log likelihood = -9201.7211
Iteration 3: log likelihood = -9168.2085
Iteration 4: log likelihood = -9162.6838
Iteration 5: log likelihood = -9161.9602
Iteration 6: log likelihood = -9161.9209
Iteration 7: log likelihood = -9161.9208
```

```
Mixed-effects nbinomial regression          Number of obs   =       1,588
Overdispersion:          mean                Number of groups =         30
Group variable:    country_code              Obs per group:
                                                min =         42
                                                avg =        52.9
                                                max =         63

Integration method: mvaghermite              Integration pts. =         7

Log likelihood = -9161.9208                  Wald chi2(24)    =       3035.84
                                                Prob > chi2      =         0.0000
```

| cases       | IRR      | Std. Err. | z     | P> z  | [95% Conf. Interval] |          |
|-------------|----------|-----------|-------|-------|----------------------|----------|
| mass14      |          |           |       |       |                      |          |
| 1           | 1.546279 | .1388527  | 4.85  | 0.000 | 1.296736             | 1.843843 |
| 2           | 1.44411  | .194042   | 2.73  | 0.006 | 1.109752             | 1.879206 |
| 3           | 1.202014 | .2197375  | 1.01  | 0.314 | .8400459             | 1.719949 |
| 4           | .8038274 | .1994619  | -0.88 | 0.379 | .4942486             | 1.307315 |
| business14  |          |           |       |       |                      |          |
| 1           | 1.204076 | .12594    | 1.78  | 0.076 | .9808952             | 1.478036 |
| 2           | .9057518 | .1367136  | -0.66 | 0.512 | .6737975             | 1.217556 |
| 3           | .6316922 | .1282855  | -2.26 | 0.024 | .4242692             | .9405231 |
| 4           | .3694655 | .15298    | -2.40 | 0.016 | .1641071             | .8318027 |
| education14 |          |           |       |       |                      |          |
| 1           | 1.565542 | .1509728  | 4.65  | 0.000 | 1.295923             | 1.891255 |
| 2           | 1.037304 | .15069    | 0.25  | 0.801 | .7802814             | 1.378989 |
| 3           | .4584379 | .0886586  | -4.03 | 0.000 | .3138082             | .6697253 |
| 4           | .3896325 | .1151281  | -3.19 | 0.001 | .218345              | .6952919 |

|                 |           |            |        |       |           |           |
|-----------------|-----------|------------|--------|-------|-----------|-----------|
| non_essential14 |           |            |        |       |           |           |
| 1               | 1.090845  | .1123048   | 0.84   | 0.398 | .8915174  | 1.334738  |
| 2               | .9366864  | .1212635   | -0.51  | 0.613 | .7267709  | 1.207232  |
| 3               | .811321   | .1463667   | -1.16  | 0.246 | .5696806  | 1.155458  |
| 4               | 1.809959  | 1.183796   | 0.91   | 0.364 | .5022778  | 6.52219   |
| home14          |           |            |        |       |           |           |
| 1               | 1.478777  | .1440292   | 4.02   | 0.000 | 1.221793  | 1.789812  |
| 2               | 1.825602  | .2120113   | 5.18   | 0.000 | 1.453965  | 2.292229  |
| 3               | 1.762915  | .287684    | 3.47   | 0.001 | 1.280344  | 2.42737   |
| 4               | 1         | (omitted)  |        |       |           |           |
| masks14         |           |            |        |       |           |           |
| 1               | .5638435  | .0473464   | -6.82  | 0.000 | .4782803  | .6647138  |
| 2               | .4510717  | .0561698   | -6.39  | 0.000 | .3533861  | .5757601  |
| 3               | .7172957  | .1678056   | -1.42  | 0.156 | .4534887  | 1.134567  |
| dayfromfirst    | 1.098089  | .0058299   | 17.62  | 0.000 | 1.086722  | 1.109576  |
| tests1mpop16apr | 1.000056  | 7.86e-06   | 7.09   | 0.000 | 1.00004   | 1.000071  |
| _cons           | 3.78e-07  | 6.11e-08   | -91.54 | 0.000 | 2.75e-07  | 5.19e-07  |
| ln(popdata2018) | 1         | (exposure) |        |       |           |           |
| /lnalpha        | -.6096359 | .0371429   |        |       | -.6824347 | -.5368371 |
| country_code    |           |            |        |       |           |           |
| var(_cons)      | .2206711  | .0606155   |        |       | .1288046  | .3780588  |

Note: Estimates are transformed only in the first equation.

Note: \_cons estimates baseline incidence rate (conditional on zero random effects).

LR test vs. nbinomial model:  $\text{chibar2}(01) = 366.57$  Prob >=  $\text{chibar2} = 0.0000$

6 . menbreg deaths ib0.mass ib0.business ib0.education ib0.non\_essential ib0.home ib0.masks dayfromfirst tests1mpop16apr

Fitting fixed-effects model:

Iteration 0: log likelihood = -6092.0787 (not concave)  
 Iteration 1: log likelihood = -5450.907 (not concave)  
 Iteration 2: log likelihood = -5093.0957 (not concave)  
 Iteration 3: log likelihood = -5002.9839  
 Iteration 4: log likelihood = -4827.041 (backed up)  
 Iteration 5: log likelihood = -4626.4817  
 Iteration 6: log likelihood = -4620.6277  
 Iteration 7: log likelihood = -4620.566  
 Iteration 8: log likelihood = -4620.566

Refining starting values:

Grid node 0: log likelihood = -4349.6314

Fitting full model:

Iteration 0: log likelihood = -4349.6314  
 Iteration 1: log likelihood = -4132.8538  
 Iteration 2: log likelihood = -4098.1002  
 Iteration 3: log likelihood = -4096.2717  
 Iteration 4: log likelihood = -4096.2635  
 Iteration 5: log likelihood = -4096.2635

Mixed-effects nbinomial regression  
 Overdispersion: mean  
 Group variable: country\_code  
 Number of obs = 1,588  
 Number of groups = 30  
 Obs per group:  
 min = 42  
 avg = 52.9  
 max = 63

Integration method: mvaghermite Integration pts. = 7



Log likelihood = -4096.2635      Wald chi2(38) = 4664.97  
 Prob > chi2 = 0.0000

| deaths          | IRR       | Std. Err.  | z      | P> z  | [95% Conf. Interval] |          |
|-----------------|-----------|------------|--------|-------|----------------------|----------|
| mass            |           |            |        |       |                      |          |
| 1               | .7563676  | .120079    | -1.76  | 0.079 | .5541129             | 1.032446 |
| 2               | .5832463  | .1076164   | -2.92  | 0.003 | .406251              | .8373551 |
| 3               | .5948864  | .132347    | -2.33  | 0.020 | .384648              | .9200357 |
| 4               | .5578361  | .1458002   | -2.23  | 0.026 | .3342183             | .9310714 |
| 5               | .5042393  | .1518256   | -2.27  | 0.023 | .2794739             | .9097709 |
| 6               | .4930222  | .1732332   | -2.01  | 0.044 | .2476167             | .9816419 |
| business        |           |            |        |       |                      |          |
| 1               | 1.066555  | .1597097   | 0.43   | 0.667 | .7952827             | 1.43036  |
| 2               | 1.073205  | .19744     | 0.38   | 0.701 | .7483161             | 1.539147 |
| 3               | .7191153  | .1582015   | -1.50  | 0.134 | .4672387             | 1.106772 |
| 4               | .4951598  | .130937    | -2.66  | 0.008 | .2948892             | .8314419 |
| 5               | .415128   | .1298009   | -2.81  | 0.005 | .2249216             | .7661838 |
| 6               | .3742309  | .1370291   | -2.68  | 0.007 | .1825836             | .7670388 |
| education       |           |            |        |       |                      |          |
| 1               | 2.509827  | .3650106   | 6.33   | 0.000 | 1.887345             | 3.337615 |
| 2               | 3.140665  | .6171348   | 5.82   | 0.000 | 2.136791             | 4.616163 |
| 3               | 2.756948  | .6459132   | 4.33   | 0.000 | 1.741824             | 4.363679 |
| 4               | 2.019311  | .5457603   | 2.60   | 0.009 | 1.188909             | 3.429714 |
| 5               | 1.096814  | .3385769   | 0.30   | 0.765 | .5989282             | 2.008591 |
| 6               | .5517744  | .1932168   | -1.70  | 0.089 | .277775              | 1.096049 |
| non_essential   |           |            |        |       |                      |          |
| 1               | 1.396027  | .2180175   | 2.14   | 0.033 | 1.027926             | 1.895946 |
| 2               | 1.405768  | .2414743   | 1.98   | 0.047 | 1.003921             | 1.968466 |
| 3               | 1.418574  | .2602883   | 1.91   | 0.057 | .9900763             | 2.032523 |
| 4               | 1.440418  | .3027939   | 1.74   | 0.083 | .9540155             | 2.174812 |
| 5               | 1.044527  | .2531821   | 0.18   | 0.857 | .649528              | 1.679739 |
| 6               | .7685437  | .2336021   | -0.87  | 0.386 | .4235866             | 1.394424 |
| home            |           |            |        |       |                      |          |
| 1               | 1.304813  | .2010532   | 1.73   | 0.084 | .964695              | 1.764844 |
| 2               | 2.007811  | .3310027   | 4.23   | 0.000 | 1.453436             | 2.773638 |
| 3               | 2.2306    | .3901335   | 4.59   | 0.000 | 1.583237             | 3.14266  |
| 4               | 1.985532  | .3800538   | 3.58   | 0.000 | 1.364417             | 2.889393 |
| 5               | 1.835626  | .4052875   | 2.75   | 0.006 | 1.190824             | 2.829573 |
| 6               | 1.213501  | .3408576   | 0.69   | 0.491 | .6997581             | 2.104419 |
| masks           |           |            |        |       |                      |          |
| 1               | .9091138  | .0910322   | -0.95  | 0.341 | .7471108             | 1.106246 |
| 2               | .8940483  | .103534    | -0.97  | 0.333 | .7125065             | 1.121846 |
| 3               | .9701593  | .1395542   | -0.21  | 0.833 | .7318137             | 1.286132 |
| 4               | 1.399045  | .3072944   | 1.53   | 0.126 | .9096386             | 2.151764 |
| 5               | 1.357023  | .4367027   | 0.95   | 0.343 | .7222082             | 2.549833 |
| 6               | 1.453493  | .6602568   | 0.82   | 0.410 | .5966917             | 3.540591 |
| dayfromfirst    | 1.167611  | .0100284   | 18.04  | 0.000 | 1.14812              | 1.187433 |
| tests1mpop16apr | 1.000021  | .0000182   | 1.17   | 0.243 | .9999855             | 1.000057 |
| _cons           | 2.98e-09  | 1.07e-09   | -54.76 | 0.000 | 1.47e-09             | 6.01e-09 |
| ln(popdata2018) | 1         | (exposure) |        |       |                      |          |
| /lnalpha        | -1.205326 | .0668716   |        |       | -1.336392            | -1.07426 |
| country_code    |           |            |        |       |                      |          |
| var(_cons)      | 1.190973  | .3250558   |        |       | .6975593             | 2.033401 |

Note: Estimates are transformed only in the first equation.

Note: \_cons estimates baseline incidence rate (conditional on zero random effects).

LR test vs. nbinomial model: chibar2(01) = 1048.60      Prob >= chibar2 = 0.0000

7 . menbreg deaths ib0.mass4 ib0.business4 ib0.education4 ib0.non\_essential4 ib0.home4 ib0.masks4 dayfromfirst tests1m

Fitting fixed-effects model:

Iteration 0: log likelihood = **-6085.9998** (not concave)  
Iteration 1: log likelihood = **-5456.6922** (not concave)  
Iteration 2: log likelihood = **-5087.2181** (not concave)  
Iteration 3: log likelihood = **-4993.0782** (not concave)  
Iteration 4: log likelihood = **-4947.6529**  
Iteration 5: log likelihood = **-4649.61**  
Iteration 6: log likelihood = **-4596.5313**  
Iteration 7: log likelihood = **-4595.8369**  
Iteration 8: log likelihood = **-4595.8358**  
Iteration 9: log likelihood = **-4595.8358**

Refining starting values:

Grid node 0: log likelihood = **-4329.3104**

Fitting full model:

Iteration 0: log likelihood = **-4329.3104**  
Iteration 1: log likelihood = **-4114.8771**  
Iteration 2: log likelihood = **-4062.0213**  
Iteration 3: log likelihood = **-4048.4743**  
Iteration 4: log likelihood = **-4048.4537**  
Iteration 5: log likelihood = **-4048.4537**

Mixed-effects nbinomial regression  
Overdispersion: mean  
Group variable: country\_code

Number of obs = **1,588**  
Number of groups = **30**  
Obs per group:  
min = **42**  
avg = **52.9**  
max = **63**

Integration method: mvaghermite

Integration pts. = **7**

Log likelihood = **-4048.4537**

Wald chi2(74) = **4914.42**  
Prob > chi2 = **0.0000**

| deaths    | IRR      | Std. Err. | z     | P> z  | [95% Conf. Interval] |  |
|-----------|----------|-----------|-------|-------|----------------------|--|
| mass4     |          |           |       |       |                      |  |
| 1         | .5847977 | .1084222  | -2.89 | 0.004 | .4066229 .8410455    |  |
| 2         | .5879855 | .1128876  | -2.77 | 0.006 | .4035934 .8566218    |  |
| 3         | .3668961 | .0810156  | -4.54 | 0.000 | .2380051 .5655876    |  |
| 4         | .3894459 | .0994524  | -3.69 | 0.000 | .2360895 .642418     |  |
| 5         | .3189652 | .0926378  | -3.93 | 0.000 | .1805206 .5635855    |  |
| 6         | .2822302 | .0922415  | -3.87 | 0.000 | .1487321 .5355529    |  |
| 7         | .2450735 | .0896624  | -3.84 | 0.000 | .1196401 .5020144    |  |
| 8         | .2146618 | .0865236  | -3.82 | 0.000 | .097423 .4729859     |  |
| 9         | .1879309 | .0837082  | -3.75 | 0.000 | .0784974 .4499255    |  |
| 10        | .1686319 | .0816859  | -3.67 | 0.000 | .0652551 .4357775    |  |
| 11        | .1707839 | .0900275  | -3.35 | 0.001 | .0607774 .4799008    |  |
| 12        | .1472727 | .0855079  | -3.30 | 0.001 | .0471962 .4595552    |  |
| 13        | .1240041 | .0795963  | -3.25 | 0.001 | .0352422 .4363239    |  |
| 14        | .0943584 | .071085   | -3.13 | 0.002 | .021554 .4130801     |  |
| business4 |          |           |       |       |                      |  |
| 1         | 1.097531 | .1790413  | 0.57  | 0.568 | .7971858 1.511034    |  |
| 2         | .9655254 | .1806591  | -0.19 | 0.851 | .6691071 1.393259    |  |
| 3         | 1.130661 | .2418595  | 0.57  | 0.566 | .7434505 1.719542    |  |
| 4         | .8317088 | .2021432  | -0.76 | 0.448 | .516524 1.339221     |  |
| 5         | .6129191 | .1689121  | -1.78 | 0.076 | .3571278 1.05192     |  |
| 6         | .5121274 | .1606383  | -2.13 | 0.033 | .2769382 .9470506    |  |
| 7         | .4135227 | .1467851  | -2.49 | 0.013 | .2062313 .8291708    |  |
| 8         | .3753815 | .1481539  | -2.48 | 0.013 | .1731907 .8136194    |  |
| 9         | .3705288 | .1619581  | -2.27 | 0.023 | .157312 .8727343     |  |
| 10        | .3681416 | .1775462  | -2.07 | 0.038 | .143054 .9473923     |  |
| 11        | .3111824 | .1710421  | -2.12 | 0.034 | .105962 .9138603     |  |

|                 |           |            |        |       |           |           |
|-----------------|-----------|------------|--------|-------|-----------|-----------|
| 12              | .1111157  | .1535649   | -1.59  | 0.112 | .0074027  | 1.667859  |
| education4      |           |            |        |       |           |           |
| 1               | 2.056265  | .3068929   | 4.83   | 0.000 | 1.534756  | 2.754984  |
| 2               | 2.623156  | .4945699   | 5.11   | 0.000 | 1.812753  | 3.795856  |
| 3               | 2.668537  | .6027761   | 4.35   | 0.000 | 1.713964  | 4.15475   |
| 4               | 2.425121  | .6178535   | 3.48   | 0.001 | 1.471875  | 3.995728  |
| 5               | 2.349112  | .6718227   | 2.99   | 0.003 | 1.341123  | 4.114707  |
| 6               | 1.985382  | .6332169   | 2.15   | 0.032 | 1.062582  | 3.70959   |
| 7               | 1.367885  | .4844265   | 0.88   | 0.376 | .6832864  | 2.738397  |
| 8               | .8678009  | .3380697   | -0.36  | 0.716 | .4044054  | 1.862186  |
| 9               | .609483   | .2606812   | -1.16  | 0.247 | .2635696  | 1.409379  |
| 10              | .3384913  | .15844     | -2.31  | 0.021 | .1352445  | .8471793  |
| 11              | .2831938  | .1458306   | -2.45  | 0.014 | .1032185  | .7769802  |
| 12              | .1266484  | .0854567   | -3.06  | 0.002 | .0337479  | .475283   |
| 13              | .0735043  | .062757    | -3.06  | 0.002 | .0137901  | .3917934  |
| non_essential4  |           |            |        |       |           |           |
| 1               | 1.378051  | .229698    | 1.92   | 0.054 | .9939952  | 1.910497  |
| 2               | 1.334065  | .2391555   | 1.61   | 0.108 | .9388226  | 1.895704  |
| 3               | 1.300853  | .2380027   | 1.44   | 0.151 | .9088523  | 1.861929  |
| 4               | 1.325037  | .2503383   | 1.49   | 0.136 | .914979   | 1.918867  |
| 5               | 1.326435  | .2586255   | 1.45   | 0.147 | .9051498  | 1.943799  |
| 6               | 1.41912   | .3067426   | 1.62   | 0.105 | .9290346  | 2.167735  |
| 7               | 1.314033  | .3094178   | 1.16   | 0.246 | .8282709  | 2.084684  |
| 8               | 1.058531  | .2738149   | 0.22   | 0.826 | .6375577  | 1.757469  |
| 9               | .9468984  | .2855925   | -0.18  | 0.856 | .5242927  | 1.710145  |
| 10              | .681326   | .2583866   | -1.01  | 0.312 | .3239997  | 1.432733  |
| 11              | 1.030781  | .6757346   | 0.05   | 0.963 | .2852047  | 3.725431  |
| home4           |           |            |        |       |           |           |
| 1               | 1.301498  | .2272646   | 1.51   | 0.131 | .9242905  | 1.832645  |
| 2               | 1.547739  | .2765779   | 2.44   | 0.015 | 1.090409  | 2.196877  |
| 3               | 2.382469  | .4240976   | 4.88   | 0.000 | 1.680765  | 3.377129  |
| 4               | 2.368919  | .4322144   | 4.73   | 0.000 | 1.65671   | 3.3873    |
| 5               | 2.575174  | .4875535   | 5.00   | 0.000 | 1.776847  | 3.732185  |
| 6               | 2.409067  | .4857608   | 4.36   | 0.000 | 1.622609  | 3.576712  |
| 7               | 2.317956  | .5088787   | 3.83   | 0.000 | 1.50742   | 3.564314  |
| 8               | 2.19568   | .5343065   | 3.23   | 0.001 | 1.362806  | 3.537563  |
| 9               | 1.783916  | .5160842   | 2.00   | 0.045 | 1.011866  | 3.145037  |
| 10              | 1.516464  | .5632429   | 1.12   | 0.262 | .7322846  | 3.140394  |
| 11              | .8600512  | .7007593   | -0.19  | 0.853 | .1741709  | 4.24691   |
| masks4          |           |            |        |       |           |           |
| 1               | .9292004  | .1070975   | -0.64  | 0.524 | .7413135  | 1.164708  |
| 2               | .9410561  | .1158773   | -0.49  | 0.622 | .739269   | 1.197922  |
| 3               | .9575459  | .1279443   | -0.32  | 0.745 | .7369274  | 1.244212  |
| 4               | 1.024722  | .1585697   | 0.16   | 0.875 | .7566373  | 1.387793  |
| 5               | 1.11171   | .1904436   | 0.62   | 0.536 | .7946477  | 1.555278  |
| 6               | 1.590809  | .3522862   | 2.10   | 0.036 | 1.030667  | 2.455372  |
| 7               | 1.490327  | .4674364   | 1.27   | 0.203 | .8059439  | 2.755867  |
| 8               | 1.038825  | .4130926   | 0.10   | 0.924 | .4764953  | 2.264779  |
| 9               | 3.151694  | 1.254835   | 2.88   | 0.004 | 1.444247  | 6.877754  |
| 10              | 2.579486  | 1.956182   | 1.25   | 0.211 | .583465   | 11.40385  |
| 11              | 2.780446  | 3.416485   | 0.83   | 0.405 | .2501477  | 30.90524  |
| dayfromfirst    | 1.206331  | .01368     | 16.54  | 0.000 | 1.179815  | 1.233444  |
| tests1mpop16apr | 1.000018  | .0000192   | 0.92   | 0.357 | .99998    | 1.000055  |
| _cons           | 2.61e-09  | 9.77e-10   | -52.74 | 0.000 | 1.25e-09  | 5.43e-09  |
| ln(popdata2018) | 1         | (exposure) |        |       |           |           |
| /lnalpha        | -1.326459 | .0685182   |        |       | -1.460752 | -1.192165 |
| country_code    |           |            |        |       |           |           |
| var(_cons)      | 1.306631  | .3616677   |        |       | .7595306  | 2.247814  |

Note: Estimates are transformed only in the first equation.

Note: \_cons estimates baseline incidence rate (conditional on zero random effects).

LR test vs. nbinomial model:  $\text{chibar2}(01) = 1094.76$  Prob >= chibar2 = 0.0000

8 . menbreg deaths ib0.mass10 ib0.business10 ib0.education10 ib0.non\_essential10 ib0.home10 ib0.masks10 dayfromfirst t

Fitting fixed-effects model:

Iteration 0: log likelihood = **-6096.7024** (not concave)  
 Iteration 1: log likelihood = **-5442.2489** (not concave)  
 Iteration 2: log likelihood = **-5099.6838** (not concave)  
 Iteration 3: log likelihood = **-5013.7263**  
 Iteration 4: log likelihood = **-4717.0454** (backed up)  
 Iteration 5: log likelihood = **-4649.6372**  
 Iteration 6: log likelihood = **-4648.6644**  
 Iteration 7: log likelihood = **-4648.66**  
 Iteration 8: log likelihood = **-4648.66**

Refining starting values:

Grid node 0: log likelihood = **-4387.6526**

Fitting full model:

Iteration 0: log likelihood = **-4387.6526**  
 Iteration 1: log likelihood = **-4188.023**  
 Iteration 2: log likelihood = **-4148.1391**  
 Iteration 3: log likelihood = **-4146.1946**  
 Iteration 4: log likelihood = **-4146.1839**  
 Iteration 5: log likelihood = **-4146.1839**

Mixed-effects nbinomial regression  
 Overdispersion: mean  
 Group variable: **country\_code**  
 Number of obs = **1,588**  
 Number of groups = **30**  
 Obs per group:  
     min = **42**  
     avg = **52.9**  
     max = **63**  
 Integration method: **mvaghermite**  
 Integration pts. = **7**  
 Wald chi2(33) = **4358.84**  
 Prob > chi2 = **0.0000**  
 Log likelihood = **-4146.1839**

| deaths          | IRR      | Std. Err. | z     | P> z  | [95% Conf. Interval] |          |
|-----------------|----------|-----------|-------|-------|----------------------|----------|
| mass10          |          |           |       |       |                      |          |
| 1               | .7933842 | .1263504  | -1.45 | 0.146 | .5806648             | 1.084031 |
| 2               | .6462756 | .1314059  | -2.15 | 0.032 | .4338551             | .9626996 |
| 3               | .6323483 | .1586684  | -1.83 | 0.068 | .3866993             | 1.034045 |
| 4               | .4859425 | .1477044  | -2.37 | 0.018 | .2678295             | .8816809 |
| 5               | .3990637 | .1444065  | -2.54 | 0.011 | .1963468             | .8110744 |
| 6               | .1616749 | .0796189  | -3.70 | 0.000 | .0615826             | .4244512 |
| business10      |          |           |       |       |                      |          |
| 1               | 1.354599 | .202174   | 2.03  | 0.042 | 1.011041             | 1.8149   |
| 2               | 1.20092  | .2335491  | 0.94  | 0.346 | .8203075             | 1.758133 |
| 3               | .8332331 | .2080098  | -0.73 | 0.465 | .5108237             | 1.359133 |
| 4               | .7346226 | .2298941  | -0.99 | 0.324 | .397821              | 1.356566 |
| 5               | .6529924 | .2649127  | -1.05 | 0.293 | .2948383             | 1.446213 |
| education10     |          |           |       |       |                      |          |
| 1               | 2.618531 | .3908756  | 6.45  | 0.000 | 1.954323             | 3.508479 |
| 2               | 3.272596 | .651684   | 5.95  | 0.000 | 2.21508              | 4.834986 |
| 3               | 2.401223 | .5825608  | 3.61  | 0.000 | 1.492528             | 3.863158 |
| 4               | 1.280701 | .372342   | 0.85  | 0.395 | .7243953             | 2.264228 |
| 5               | .8868284 | .3091561  | -0.34 | 0.730 | .4478198             | 1.756207 |
| non_essential10 |          |           |       |       |                      |          |
| 1               | 1.304915 | .2045242  | 1.70  | 0.090 | .9597769             | 1.774166 |
| 2               | 1.37905  | .2423596  | 1.83  | 0.067 | .9772074             | 1.946138 |
| 3               | 1.455649 | .3032486  | 1.80  | 0.072 | .9676759             | 2.189695 |
| 4               | 1.271133 | .324759   | 0.94  | 0.348 | .7704057             | 2.09731  |
| 5               | 1.779882 | .9400789  | 1.09  | 0.275 | .6321393             | 5.011522 |

|                 |           |            |        |       |           |          |
|-----------------|-----------|------------|--------|-------|-----------|----------|
| home10          |           |            |        |       |           |          |
| 1               | 1.487145  | .2242743   | 2.63   | 0.009 | 1.106585  | 1.998581 |
| 2               | 1.876879  | .313318    | 3.77   | 0.000 | 1.353133  | 2.603348 |
| 3               | 1.403147  | .2671175   | 1.78   | 0.075 | .9661836  | 2.03773  |
| 4               | .8840621  | .208023    | -0.52  | 0.600 | .5574321  | 1.402083 |
| 5               | .1816888  | .1060076   | -2.92  | 0.003 | .0579013  | .570122  |
| masks10         |           |            |        |       |           |          |
| 1               | .8454197  | .0820308   | -1.73  | 0.084 | .6990054  | 1.022502 |
| 2               | .8645704  | .1104758   | -1.14  | 0.255 | .6730275  | 1.110626 |
| 3               | 1.043792  | .2166648   | 0.21   | 0.836 | .6949062  | 1.56784  |
| 4               | 1.230409  | .4119592   | 0.62   | 0.536 | .6383439  | 2.371616 |
| 5               | 1.272183  | 1.557947   | 0.20   | 0.844 | .1153845  | 14.02659 |
| dayfromfirst    | 1.147815  | .0090551   | 17.48  | 0.000 | 1.130204  | 1.165701 |
| tests1mpop16apr | 1.000016  | .000019    | 0.82   | 0.410 | .9999784  | 1.000053 |
| _cons           | 3.40e-09  | 1.26e-09   | -52.51 | 0.000 | 1.64e-09  | 7.04e-09 |
| ln(popdata2018) | 1         | (exposure) |        |       |           |          |
| /lnalpha        | -1.085879 | .065591    |        |       | -1.214435 | -.957323 |
| country_code    |           |            |        |       |           |          |
| var(_cons)      | 1.294418  | .3538466   |        |       | .7575077  | 2.211882 |

Note: Estimates are transformed only in the first equation.

Note: \_cons estimates baseline incidence rate (conditional on zero random effects).

LR test vs. nbinomial model: chibar2(01) = 1004.95 Prob >= chibar2 = **0.0000**

9 . menbreg deaths ib0.mass14 ib0.business14 ib0.education14 ib0.non\_essential14 ib0.home14 ib0.masks14 dayfromfirst  
note: 4.home14 omitted because of collinearity

Fitting fixed-effects model:

Iteration 0: log likelihood = **-6105.2707** (not concave)  
 Iteration 1: log likelihood = **-5341.976** (not concave)  
 Iteration 2: log likelihood = **-5109.2826** (not concave)  
 Iteration 3: log likelihood = **-5046.7401** (not concave)  
 Iteration 4: log likelihood = **-4944.9043**  
 Iteration 5: log likelihood = **-4764.9866**  
 Iteration 6: log likelihood = **-4664.3758**  
 Iteration 7: log likelihood = **-4663.255**  
 Iteration 8: log likelihood = **-4663.2537**  
 Iteration 9: log likelihood = **-4663.2537**

Refining starting values:

Grid node 0: log likelihood = **-4394.9043**

Fitting full model:

Iteration 0: log likelihood = **-4394.9043**  
 Iteration 1: log likelihood = **-4204.3637**  
 Iteration 2: log likelihood = **-4169.7704**  
 Iteration 3: log likelihood = **-4169.0356**  
 Iteration 4: log likelihood = **-4169.0308**  
 Iteration 5: log likelihood = **-4169.0308**

Mixed-effects nbinomial regression

Overdispersion: **mean**

Group variable: **country\_code**

Number of obs = **1,588**

Number of groups = **30**

Obs per group:

min = **42**

avg = **52.9**

max = **63**

Integration method: **mvaghermite**

Integration pts. = **7**

Log likelihood = **-4169.0308** Wald chi2(24) = **4122.31**  
 Prob > chi2 = **0.0000**

| deaths                 | IRR          | Std. Err. | z      | P> z  | [95% Conf. Interval] |           |
|------------------------|--------------|-----------|--------|-------|----------------------|-----------|
| <b>mass14</b>          |              |           |        |       |                      |           |
| 1                      | .8952258     | .1423886  | -0.70  | 0.487 | .6554601             | 1.222697  |
| 2                      | .9902703     | .20305    | -0.05  | 0.962 | .6625507             | 1.480091  |
| 3                      | .8994396     | .2289916  | -0.42  | 0.677 | .5460866             | 1.481435  |
| 4                      | .7018597     | .2232273  | -1.11  | 0.266 | .3762917             | 1.309109  |
| <b>business14</b>      |              |           |        |       |                      |           |
| 1                      | 1.323085     | .1970869  | 1.88   | 0.060 | .9880811             | 1.77167   |
| 2                      | .8965988     | .1750896  | -0.56  | 0.576 | .6114681             | 1.314687  |
| 3                      | .6933552     | .1757276  | -1.44  | 0.148 | .4219128             | 1.139433  |
| 4                      | 1.083379     | .4883515  | 0.18   | 0.859 | .447803              | 2.621042  |
| <b>education14</b>     |              |           |        |       |                      |           |
| 1                      | 2.777188     | .4169053  | 6.80   | 0.000 | 2.069307             | 3.727227  |
| 2                      | 2.789269     | .5449698  | 5.25   | 0.000 | 1.901874             | 4.090712  |
| 3                      | 1.343229     | .324296   | 1.22   | 0.222 | .8368432             | 2.156034  |
| 4                      | .5776422     | .1929843  | -1.64  | 0.100 | .3001105             | 1.111826  |
| <b>non_essential14</b> |              |           |        |       |                      |           |
| 1                      | 1.375352     | .2158628  | 2.03   | 0.042 | 1.011153             | 1.870729  |
| 2                      | 1.356355     | .2466374  | 1.68   | 0.094 | .949713              | 1.937111  |
| 3                      | .9347891     | .2141295  | -0.29  | 0.768 | .596666              | 1.464522  |
| 4                      | .3028598     | .1800789  | -2.01  | 0.045 | .0944325             | .9713188  |
| <b>home14</b>          |              |           |        |       |                      |           |
| 1                      | 1.658136     | .249702   | 3.36   | 0.001 | 1.234344             | 2.227431  |
| 2                      | 1.784602     | .3096292  | 3.34   | 0.001 | 1.270157             | 2.507409  |
| 3                      | 1.438098     | .3076567  | 1.70   | 0.089 | .9455587             | 2.187201  |
| 4                      | 1 (omitted)  |           |        |       |                      |           |
| <b>masks14</b>         |              |           |        |       |                      |           |
| 1                      | .7787291     | .0730946  | -2.66  | 0.008 | .647872              | .9360168  |
| 2                      | .7451864     | .1077411  | -2.03  | 0.042 | .561301              | .9893136  |
| 3                      | .6632024     | .2066264  | -1.32  | 0.187 | .3601197             | 1.221364  |
| dayfromfirst           | 1.134572     | .0075746  | 18.91  | 0.000 | 1.119823             | 1.149516  |
| tests1mpop16apr        | 1.00002      | .0000182  | 1.11   | 0.265 | .9999846             | 1.000056  |
| _cons                  | 3.38e-09     | 1.21e-09  | -54.49 | 0.000 | 1.67e-09             | 6.81e-09  |
| ln(popdata2018)        | 1 (exposure) |           |        |       |                      |           |
| /lnalpha               | -.9963278    | .0634911  |        |       | -1.120768            | -.8718875 |
| <b>country_code</b>    |              |           |        |       |                      |           |
| var(_cons)             | 1.193087     | .324013   |        |       | .7006589             | 2.031596  |

Note: Estimates are transformed only in the first equation.  
 Note: \_cons estimates baseline incidence rate (conditional on zero random effects).  
 LR test vs. nbinomial model: chibar2(01) = 988.45 Prob >= chibar2 = **0.0000**

```
10 . log close
    name: <unnamed>
    log: C:\Users\Pau1H\Dropbox\001Covid19 files\Sensitivity analyses with varying time gaps.smcl
    log type: smcl
    closed on: 28 Feb 2021, 18:07:26
```
